# Supplementary material for: A catalog of associations between rare coding variants and COVID-19 outcomes
Source: PubMed Central journal article supplement (PMC7924298; doi:10.1101/2020.10.28.20221804), 2021-02-27
Supplement: NIHPP2020.10.28.20221804-supplement-1.pdf [file NIHPP2020.10.28.20221804-supplement-1.pdf]

687 **SUPPLEMENTARY TEXT**

688

689 **Regeneron Genetics Center (RGC) Research Team and Contribution Statements**

690 All authors/contributors are listed in alphabetical order.

691

692 **RGC Management and Leadership Team**

693 Goncalo Abecasis, Ph.D., Aris Baras, M.D., Michael Cantor, M.D., Giovanni Coppola, M.D.,

694 Aris Economides, Ph.D., Luca A. Lotta, M.D., Ph.D., John D. Overton, Ph.D., Jeffrey G. Reid,

695 Ph.D., Alan Shuldiner, M.D.

696 Contribution: All authors contributed to securing funding, study design and oversight. All

697 authors reviewed the final version of the manuscript.

698

699 **Sequencing and Lab Operations**

700 Christina Beechert, Caitlin Forsythe, M.S., Erin D. Fuller, Zhenhua Gu, M.S., Michael Lattari,

701 Alexander Lopez, M.S., John D. Overton, Ph.D., Thomas D. Schleicher, M.S., Maria

702 Sotiropoulos Padilla, M.S., Louis Widom, Sarah E. Wolf, M.S., Manasi Pradhan, M.S., Kia

703 Manoochehri, Ricardo H. Ulloa.

704 Contribution: C.B., C.F., A.L., and J.D.O. performed and are responsible for sample genotyping.

705 C.B, C.F., E.D.F., M.L., M.S.P., L.W., S.E.W., A.L., and J.D.O. performed and are responsible

706 for exome sequencing. T.D.S., Z.G., A.L., and J.D.O. conceived and are responsible for

707 laboratory automation. M.P., K.M., R.U., and J.D.O are responsible for sample tracking and the

708 library information management system.

709

710 **Clinical Informatics**

711 Nilanjana Banerjee, Ph.D., Michael Cantor, M.D. M.A., Dadong Li, Ph.D., Deepika Sharma,

712 MHI

713 Contribution: All authors contributed to the development and validation of clinical phenotypes

714 used to identify study subjects and (when applicable) controls.

715

716 **Genome Informatics**

717 Xiaodong Bai, Ph.D., Suganthi Balasubramanian, Ph.D., Andrew Blumenfeld, Gisu Eom, Lukas

718 Habegger, Ph.D., Alicia Hawes, B.S., Shareef Khalid, Jeffrey G. Reid, Ph.D., Evan K. Maxwell,

719 Ph.D., William Salerno, Ph.D., Jeffrey C. Staples, Ph.D.

720 Contribution: X.B., A.H., W.S. and J.G.R. performed and are responsible for analysis needed to

721 produce exome and genotype data. G.E. and J.G.R. provided compute infrastructure

722 development and operational support. S.B., and J.G.R. provide variant and gene annotations and

723 their functional interpretation of variants. E.M., J.S., A.B., L.H., J.G.R. conceived and are

724 responsible for creating, developing, and deploying analysis platforms and computational

725 methods for analyzing genomic data.

726

727 **Analytical Genetics**

728 Gonçalo R. Abecasis, Ph.D., Joshua Backman, Ph.D., Manuel A. Ferreira, Ph.D., Lauren Gurski,

729 Jack A. Kosmicki, Ph.D., Alexander H. Li, Ph.D., Adam E. Locke, Ph.D., Anthony Marcketta,

730 Jonathan Marchini, Ph.D., Joelle Mbatchou, Ph.D., Shane McCarthy, Ph.D., Colm O'Dushlaine,

731 Ph.D., Dylan Sun, Kyoko Watanabe, Ph.D.

732 Contribution: J.A.K. and M.A.F. performed association analyses and led manuscript writing  
733 group. J.B. identified low-quality variants in exome sequence data using machine learning. L.G.  
734 and K.W. helped with visualization of association results. A.H.L., A.E.L., A.M. and D.S.  
735 prepared the analytical pipelines to perform association analyses. J.M. and J.M. developed and  
736 helped deploy REGENIE. S.M. and C.O'D. helped defined COVID-19 phenotypes. G.R.A.  
737 supervised all analyses. All authors contributed to and reviewed the final version of the  
738 manuscript.

739

#### 740 **Immune, Respiratory, and Infectious Disease Therapeutic Area Genetics**

741 Julie E. Horowitz, PhD.

742 Contribution: J.E.H. helped defined COVID-19 phenotypes, interpret association results and led  
743 the manuscript writing group.

744

#### 745 **Research Program Management**

746 Marcus B. Jones, Ph.D., Michelle LeBlanc, Ph.D., Jason Mighty, Ph.D., Lyndon J. Mitnaul,  
747 Ph.D.

748 Contribution: All authors contributed to the management and coordination of all research  
749 activities, planning and execution. All authors contributed to the review process for the final  
750 version of the manuscript.

751

752 **UK Biobank Exome Sequencing Consortium Research Team**

753

754 **<sup>1</sup>Bristol Myers Squibb**

755 Oleg Moiseyenko, Carlos Rios, Saurabh Saha

756

757 **<sup>2</sup>Regeneron Pharmaceuticals Inc.**

758 Listed in pages 38 to 40.

759

760 **<sup>3</sup>Biogen Inc.**

761 Sally John, Chia-Yen Chen, David Sexton, Paola G. Bronson, Christopher D. Whelan, Varant

762 Kupelian, Eric Marshall, Timothy Swan, Susan Eaton, Jimmy Z. Liu, Stephanie Loomis, Megan

763 Jensen, Saranya Duraisamy, Ellen A. Tsai, Heiko Runz

764

765 **<sup>4</sup>Alnylam Pharmaceuticals**

766 Aimee M. Deaton, Margaret M. Parker, Lucas D. Ward, Alexander O. Flynn-Carroll, Greg

767 Hinkle, Paul Nioi

768

769 **<sup>5</sup>AstraZeneca**

770 Olympe Chazara, Sri VV. Deevi, Xiao Jiang, Amanda O'Neill, Slavé Petrovski, Katherine

771 Smith, Quanli Wang

772

773 **<sup>6</sup>Takeda California Inc**

774 Jason Tetrault, Dorothee Diogo, Aldo Cordova Palomera, Emily Wong, Rajesh Mikkilineni,

775 David Merberg, Sunita Badola, Erin N. Smith, Sandor Szalma

776

777 <sup>7</sup>**Pfizer, Inc**

778 Yi-Pin Lai, Xing Chen, Xinli Hu, Melissa R. Miller

779

780 <sup>8</sup>**Abbvie**

781 Xiuwen Zheng, Bridget Riley-Gillis, Jason Grundstad, Sahar Esmaeeli, Jeff Waring, J. Wade

782 Davis

783

784 <sup>1</sup>Bristol Myers Squibb, Route 206 and Province Line Road, Princeton, NJ 08543, USA

785 <sup>2</sup>Regeneron Pharmaceuticals Inc., 777 Old Saw Mill River Road, Tarrytown, New York 10591,

786 USA

787 <sup>3</sup>Biogen Inc., 225 Binney Street, Cambridge, MA 02139, USA

788 <sup>4</sup>Alnylam Pharmaceuticals, 675 West Kendall St, Cambridge, MA 02142, USA

789 <sup>5</sup>AstraZeneca Centre for Genomics Research, Discovery Sciences, BioPharmaceuticals R&D,

790 Cambridge, UK

791 <sup>6</sup>Takeda California Inc., 9625 Towne Centre Dr, San Diego, CA 92121, USA

792 <sup>7</sup> Pfizer, Inc., 1 Portland Street, Cambridge MA 02139, USA

793 <sup>8</sup> AbbVie, Inc., 1 N. Waukegan Rd, North Chicago, IL 60064, USA

794

795

796 **GenOMICC Consortium**

797 Sara Clohisey<sup>1</sup>, Fiona Griffiths<sup>1</sup>, James Furniss<sup>1</sup>, James Furniss<sup>1</sup>, Trevor Paterson<sup>1</sup>, Tony  
798 Wackett<sup>1</sup>, Ruth Armstrong<sup>1</sup>, Wilna Oosthuizen<sup>1</sup>, Nick Parkinson<sup>1</sup>, Max Head Fourman<sup>1</sup>, Andrew  
799 Law<sup>1</sup>, Veronique Vitart<sup>2</sup>, Lucija Klaric<sup>2</sup>, Anne Richmond<sup>2</sup>, Chris P. Ponting<sup>2</sup>, Andrew D.  
800 Bretherick<sup>2</sup>, Charles Hinds<sup>3</sup>, Timothy Walsh<sup>4</sup>, Sean Keating<sup>4</sup>, Clark D Russell<sup>1,5</sup>, Malcolm G.  
801 Semple<sup>6,7</sup>, Kathy Rowan<sup>8</sup>, Elvina Gountouna<sup>9</sup>, Nicola Wrobel<sup>10</sup>, Lee Murphy<sup>10</sup>, Angie Fawkes<sup>10</sup>,  
802 Richard Clark<sup>10</sup>, Audrey Coutts<sup>10</sup>, Lorna Donnelly<sup>10</sup>, Tammy Gilchrist<sup>10</sup>, Katarzyna Hafezi<sup>10</sup>,  
803 Louise Macgillivray<sup>10</sup>, Alan Maclean<sup>10</sup>, Sarah McCafferty<sup>10</sup>, Kirstie Morrice<sup>10</sup>, , Angie Fawkes<sup>10</sup>,  
804 Julian Knight<sup>11</sup>, Charlotte Summers<sup>12</sup>, Manu Shankar-Hari<sup>13,14</sup>, Peter Horby<sup>15</sup>, Alistair  
805 Nichol<sup>16,17,18</sup>, David Maslove<sup>19</sup>, Lowell Ling<sup>20</sup>, Danny McAuley<sup>21,22</sup>, Hugh Montgomery<sup>23</sup>, Peter  
806 J.M. Openshaw<sup>24,25</sup>.

807 <sup>1</sup>Roslin Institute, University of Edinburgh, Easter Bush, Edinburgh, EH25 9RG, UK

808 <sup>2</sup>MRC Human Genetics Unit, Institute of Genetics and Molecular Medicine, University of  
809 Edinburgh, Western General Hospital, Crewe Road, Edinburgh, EH4 2XU, UK

810 <sup>3</sup>William Harvey Research Institute, Barts and the London School of Medicine and Dentistry,  
811 Queen Mary University of London, London EC1M 6BQ, UK

812 <sup>4</sup>Intensive Care Unit, Royal Infirmary of Edinburgh, 54 Little France Drive, Edinburgh, EH16  
813 5SA, UK

814 <sup>5</sup>Centre for Inflammation Research, The Queen's Medical Research Institute, University of  
815 Edinburgh, 47 Little France Crescent, Edinburgh, UK

816 <sup>6</sup>NIHR Health Protection Research Unit for Emerging and Zoonotic Infections, Institute of  
817 Infection, Veterinary and Ecological Sciences University of Liverpool, Liverpool, L69 7BE, UK

818 <sup>7</sup>Respiratory Medicine, Alder Hey Children's Hospital, Institute in The Park, University of  
819 Liverpool, Alder Hey Children's Hospital, Liverpool, UK

820 <sup>8</sup>Intensive Care National Audit & Research Centre, London, UK

821 <sup>9</sup>Centre for Genomic and Experimental Medicine, Institute of Genetics and Molecular Medicine,  
822 University of Edinburgh, Western General Hospital, Crewe Road, Edinburgh, EH4 2XU, UK

823 <sup>10</sup>Edinburgh Clinical Research Facility, Western General Hospital, University of Edinburgh,

824 EH4 2XU, UK

825 <sup>11</sup>Wellcome Centre for Human Genetics, University of Oxford, Oxford, UK

826 <sup>12</sup>Department of Medicine, University of Cambridge, Cambridge, UK

827 <sup>13</sup>Department of Intensive Care Medicine, Guy's and St. Thomas NHS Foundation Trust,

828 London, UK

829 <sup>14</sup>School of Immunology and Microbial Sciences, King's College London, UK

830 <sup>15</sup>Centre for Tropical Medicine and Global Health, Nuffield Department of Medicine, University

831 of Oxford, Old Road Campus, Roosevelt Drive, Oxford, OX3 7FZ, UK

832 <sup>16</sup>Clinical Research Centre at St Vincent's University Hospital, University College Dublin,

833 Dublin, Ireland

834 <sup>17</sup>Australian and New Zealand Intensive Care Research Centre, Monash University, Melbourne,

835 Australia

836 <sup>18</sup>Intensive Care Unit, Alfred Hospital, Melbourne, Australia

837 <sup>19</sup>Department of Critical Care Medicine, Queen's University and Kingston Health Sciences

838 Centre, Kingston, ON, Canada

839 <sup>20</sup>Department of Anaesthesia and Intensive Care, The Chinese University of Hong Kong, Prince

840 of Wales Hospital, Hong Kong, China

841 <sup>21</sup>Wellcome-Wolfson Institute for Experimental Medicine, Queen's University Belfast, Belfast,

842 Northern Ireland, UK

843 <sup>22</sup>Department of Intensive Care Medicine, Royal Victoria Hospital, Belfast, Northern Ireland,

844 UK

845 <sup>23</sup>UCL Centre for Human Health and Performance, London, W1T 7HA, UK

846 <sup>24</sup>National Heart and Lung Institute, Imperial College London, London, UK

847 <sup>25</sup>Imperial College Healthcare NHS Trust: London, London, UK

848



## SUPPLEMENTARY FIGURES

A.

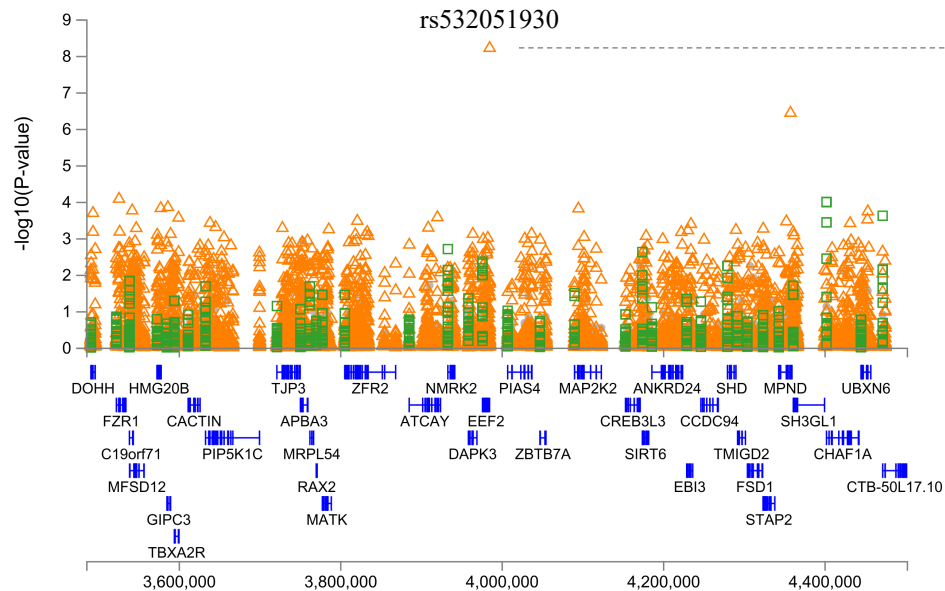

B.

| STUDY              | N CASES         | N CONTROLS         | OR [95% CI] | PVALUE                         | AAF            |              |
|--------------------|-----------------|--------------------|-------------|--------------------------------|----------------|--------------|
|                    | RR RA AA        | RR RA AA           |             |                                |                |              |
| UKB_Freeze_450_EUR | 1700 3 0        | 399228 12 0        |             | 80.95 [13.12,499.469]          | 2.2e-06        | 2e-05        |
| GHS_Freeze_145_EUR | 169 1 0         | 109282 10 0        |             | 134.763 [7.892,2301.292]       | 7.1e-04        | 5e-05        |
| <b>META</b>        | <b>1869 4 0</b> | <b>508510 22 0</b> |             | <b>93.906 [20.295,434.505]</b> | <b>6.2e-09</b> | <b>3e-05</b> |

OR (95% CI) scale: 1, 125, 600

C.

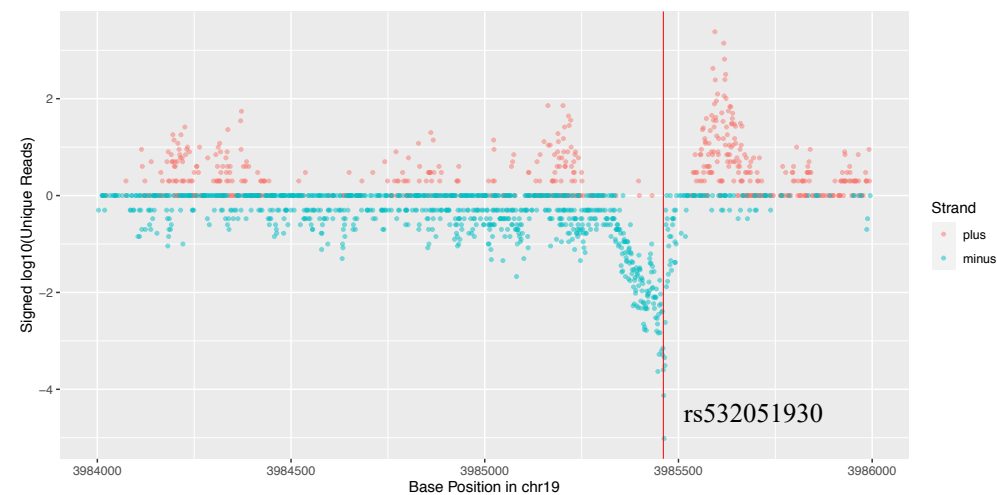

D.

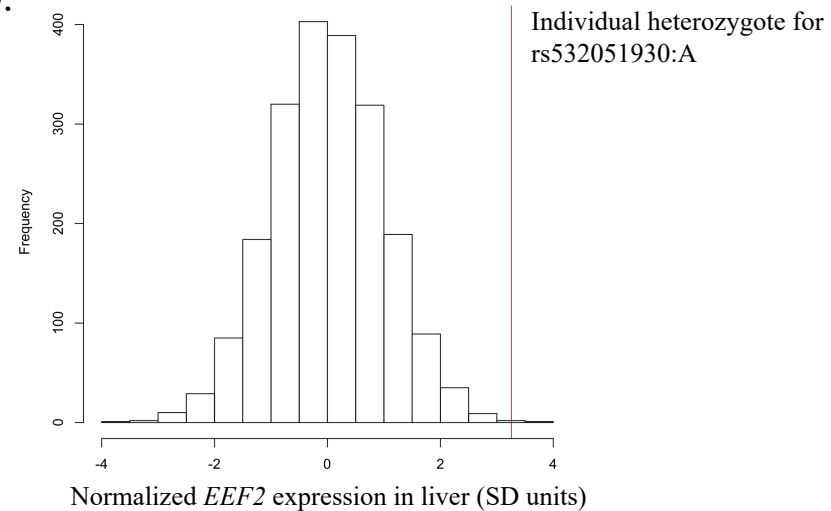

**Supplementary Figure 1. Association between a rare promoter variant in *EEF2* (rs532051930:A) and the COVID-19 hospitalization phenotype.** (A) Regional association plot centered on rs532051930. Orange triangles: individual rare variants (MAF<0.5%). Green squares: burden tests. Grey circles: individual common variants (MAF>0.5%). (B) Forest plot showing association in the two individual datasets included in the meta-analysis of this variant. (C) Results from a population-scale PROcap (Precision Run-On 5' cap sequencing) study [19], which profiles transcription start sites of nascent RNAs attached to RNA polymerase. The variant rs532051930 (vertical red line) is located 2 bp away from the peak of transcription initiation. (D) Distribution of *EEF2* expression among 1,918 individuals from the GHS study with available RNA-seq data from liver tissue. Vertical red line indicates expression levels for the only individual who was heterozygote for the rare promoter variant rs532051930.

## SUPPLEMENTARY TABLES

**Supplementary Table 1. Demographics and clinical characteristics of study participants.**

| Demographics                  | COVID-19 Positive |                  | Covid-19 Negative or Unknown |
|-------------------------------|-------------------|------------------|------------------------------|
|                               | Hospitalized      | Not Hospitalized |                              |
| <b>UK Biobank</b>             |                   |                  |                              |
| Total N                       | 1848              | 5400             | 416935                       |
| AFR ancestry, n (%)           | 80 (3.8)          | 134 (2.2)        | 8495 (1.8)                   |
| EUR ancestry, n (%)           | 1703 (81.9)       | 5030 (83.2)      | 399240 (85.7)                |
| SAS ancestry, n (%)           | 65 (3.1)          | 236 (3.9)        | 9200 (1.9)                   |
| Average Age, y (% >60y)       | 59.7 (57)         | 52.6 (22)        | 56.2 (36)                    |
| Female, n (%)                 | 737 (39.8)        | 2896 (53.6)      | 229572 (55.1)                |
| Hypertension, n (%)           | 884 (47.8)        | 1214 (22.5)      | 96851 (23.2)                 |
| Cardiovascular Disease, n (%) | 265 (14.3)        | 330 (6.1)        | 24859 (5.8)                  |
| Type 2 Diabetes, n (%)        | 342 (18.5)        | 378 (7)          | 25335 (6.1)                  |
| Chronic kidney disease, n (%) | 134 (7.3)         | 112 (2.1)        | 8096 (1.9)                   |
| Asthma, n (%)                 | 343 (18.5)        | 886 (16.4)       | 59229 (14.2)                 |
| COPD, n (%)                   | 208 (11.2)        | 164 (3)          | 10117 (2.4)                  |
| <b>GHS</b>                    |                   |                  |                              |
| Total N                       | 170               | 664              | 109292                       |
| EUR ancestry, n (%)           | 170 (100)         | 664 (100)        | 109292 (100)                 |
| Average Age, y (% >60y)       | 67.81 (76.47)     | 54.74 (39.0)     | 55.75 (44.14)                |
| Female, n (%)                 | 90 (52.94)        | 435 (65.51)      | 68226 (62.42)                |
| Hypertension, n (%)           | 138 (81.17)       | 343 (51.65)      | 53658 (49.09)                |
| Cardiovascular Disease, n (%) | 77 (45.29)        | 108 (16.26)      | 17269 (15.80)                |
| Type 2 Diabetes, n (%)        | 73 (42.94)        | 158 (23.79)      | 23290 (21.30)                |
| Chronic kidney disease, n (%) | 64 (37.64)        | 94 (14.15)       | 14246 (13.03)                |
| Asthma, n (%)                 | 15 (8.82)         | 47 (7.07)        | 6975 (6.38)                  |
| COPD, n (%)                   | 47(27.64)         | 67 (10.09)       | 10822 (9.90)                 |
| <b>PMBB</b>                   |                   |                  |                              |
| Total N                       | 67                | 99               | 959                          |
| AFR ancestry, n (%)           | 67 (100)          | 99 (100)         | 959 (100)                    |
| Average Age, y (% >60y)       | 62.58 (61.19)     | 47.64 (19.19)    | 56.24 (43.27)                |
| Female, n (%)                 | 38 (56.7)         | 72 (72.7)        | 641 (66.8)                   |
| Hypertension, n (%)           | 59 (88.1)         | 52 (52.5)        | 704 (73.4)                   |
| Cardiovascular Disease, n (%) | 40 (59.7)         | 17 (17.2)        | 359 (37.4)                   |
| Type 2 Diabetes, n (%)        | 50 (74.6)         | 31 (31.3)        | 440 (45.9)                   |
| Chronic kidney disease, n (%) | 42 (62.7)         | 13 (13.1)        | 300 (31.3)                   |
| Asthma, n (%)                 | 18 (26.9)         | 23 (23.2)        | 294 (30.7)                   |
| COPD, n (%)                   | 20 (29.9)         | 8 (8.1)          | 145 (15.1)                   |

**Supplementary Table 2. Breakdown of COVID-19 status across the four studies included in the analysis.**

| COVID-19 status | Positive qPCR or serology for SARS-CoV-2 | ICD10 U07 diagnosis or hospitalization | Severe COVID-19 (ventilation or death) | Negative qPCR or serology test for SARS-CoV-2 |              |             |             |              |
|-----------------|------------------------------------------|----------------------------------------|----------------------------------------|-----------------------------------------------|--------------|-------------|-------------|--------------|
|                 |                                          |                                        |                                        |                                               | UK Biobank   | GHS         | PMBB        | Total        |
| Positive        | Yes                                      | Yes                                    | Yes                                    | Yes or No or NA                               | 382          | 49          | 27          | 458          |
|                 | Yes                                      | Yes                                    | No or NA                               | Yes or No or NA                               | 1119         | 121         | 40          | 1,280        |
|                 | Yes                                      | No or NA                               | Yes                                    | Yes or No or NA                               | 0            | 0           | 0           | 0            |
|                 | Yes                                      | No or NA                               | No or NA                               | Yes or No or NA                               | 5400         | 664         | 99          | 6,163        |
|                 | No or NA                                 | Yes                                    | Yes                                    | No or NA                                      | 122          | 0           | 0           | 122          |
|                 | No or NA                                 | Yes                                    | No or NA                               | No or NA                                      | 77           | 0           | 0           | 77           |
|                 | No or NA                                 | No or NA                               | Yes                                    | No or NA                                      | 0            | 0           | 0           | 0            |
|                 | No or NA                                 | Yes                                    | Yes                                    | Yes                                           | 37           | 0           | 0           | 37           |
|                 | No or NA                                 | Yes                                    | No or NA                               | Yes                                           | 111          | 0           | 0           | 111          |
|                 | No or NA                                 | No or NA                               | Yes                                    | Yes                                           | 0            | 0           | 0           | 0            |
|                 |                                          |                                        |                                        |                                               | Total = 7248 | Total = 834 | Total = 166 | Total = 8248 |
| Negative        | No or NA                                 | No or NA                               | No or NA                               | Yes                                           | 32,867       | 15,574      | 959         | 49,400       |
| Unknown         | NA                                       | No or NA                               | No or NA                               | NA                                            | 384,068      | 93,718      | 7,779       | 485,565      |
| Total           |                                          |                                        |                                        |                                               | 424,183      | 110,126     | 8,904       | 543,213      |

**Supplementary Table 3. Definitions used for the seven COVID-19 phenotypes analyzed.**

| Broad phenotype category                                      | Phenotype                                                                     | Case/control group  | Definition          |                |                | Sample size with genetic data |         |         |         |
|---------------------------------------------------------------|-------------------------------------------------------------------------------|---------------------|---------------------|----------------|----------------|-------------------------------|---------|---------|---------|
|                                                               |                                                                               |                     | COVID-19 status     | Hospitalized   | Severe disease | UK Biobank                    | GHS     | PMBB    | Total   |
| Risk of infection                                             | COVID-19 positive vs. COVID-19 negative or unknown                            | Cases               | Positive            | Yes, No or NA  | Yes, No or NA  | 7,248                         | 834     | 166     | 8,248   |
|                                                               |                                                                               | Controls            | Negative or unknown | No or NA       | No or NA       | 416,935                       | 109,292 | 8,738   | 534,965 |
|                                                               | COVID-19 positive vs. COVID-19 negative                                       | Cases               | Positive            | Yes, No or NA  | Yes, No or NA  | 7,248                         | 834     | 166     | 8,248   |
|                                                               |                                                                               | Controls            | Negative            | No or NA       | No or NA       | 32,867                        | 15,574  | 959     | 49,400  |
|                                                               | COVID-19 positive and not hospitalized vs. COVID-19 negative or unknown       | Cases               | Positive            | No             | No             | 5,400                         | 664     | 99      | 6,163   |
|                                                               |                                                                               | Controls            | Negative or unknown | No or NA       | No or NA       | 416,935                       | 109,292 | 8,738   | 534,965 |
|                                                               | COVID-19 positive and hospitalized vs. COVID-19 negative or unknown           | Cases               | Positive            | Yes (or death) | Yes, No or NA  | 1,848                         | 170     | 67      | 2,085   |
|                                                               |                                                                               | Controls            | Negative or unknown | No or NA       | No or NA       | 416,935                       | 109,292 | 8,738   | 534,965 |
| COVID-19 positive and severe vs. COVID-19 negative or unknown | Cases                                                                         | Positive            | Yes, No or NA       | Yes            | 541            | 49                            | NA      | 590     |         |
|                                                               | Controls                                                                      | Negative or unknown | No or NA            | No or NA       | 416,935        | 109,292                       | NA      | 526,227 |         |
| Risk of adverse outcomes amongst infected individuals         | COVID-19 positive and hospitalized vs. COVID-19 positive and not hospitalized | Cases               | Positive            | Yes (or death) | Yes, No or NA  | 1,703                         | 170     | 67      | 1,940   |
|                                                               |                                                                               | Controls            | Positive            | No             | No             | 5,030                         | 664     | 99      | 5,793   |
|                                                               | COVID-19 positive and severe vs. COVID-19 positive and not hospitalized       | Cases               | Positive            | Yes, No or NA  | Yes            | 523                           | 49      | NA      | 572     |
|                                                               |                                                                               | Controls            | Positive            | No             | No             | 5,164                         | 664     | NA      | 5,828   |

**Supplementary Table 4. Genomic inflation factor (lambda GC) observed in the analysis of exome sequence variants for each of the seven phenotypes tested.**

| Phenotype                                                                   | Study                 | Ancestry | N cases | N controls | Exome-sequencing variants with MAF<0.5% & MAC>=5 |                                            |           | Exome-sequencing variants with MAF<0.5% & MAC>25 |                                            |           | Exome-sequencing variants with MAF>0.5% |                                            |           |
|-----------------------------------------------------------------------------|-----------------------|----------|---------|------------|--------------------------------------------------|--------------------------------------------|-----------|--------------------------------------------------|--------------------------------------------|-----------|-----------------------------------------|--------------------------------------------|-----------|
|                                                                             |                       |          |         |            | N variants                                       | Proportion of variants with MAC=0 in cases | Lambda GC | N variants                                       | Proportion of variants with MAC=0 in cases | Lambda GC | N variants                              | Proportion of variants with MAC=0 in cases | Lambda GC |
|                                                                             |                       |          |         |            |                                                  |                                            |           |                                                  |                                            |           |                                         |                                            |           |
| COVID19_positive_hospitalized_vs_COVID19_negative_or_unknown_combined       | UKB Freeze 450        | SAS      | 65      | 9200       | 798145                                           | 0.873                                      | 0.202     | 222553                                           | 0.719                                      | 0.774     | 227664                                  | 0.193                                      | 1.254     |
|                                                                             | UPENN-PMBB Freeze One | AFR      | 67      | 8738       | 890983                                           | 0.857                                      | 0.215     | 279379                                           | 0.708                                      | 0.748     | 486699                                  | 0.132                                      | 1.099     |
|                                                                             | UKB Freeze 450        | AFR      | 80      | 8495       | 812651                                           | 0.830                                      | 0.268     | 248412                                           | 0.653                                      | 0.803     | 380222                                  | 0.120                                      | 0.947     |
|                                                                             | GHS Freeze 145 Exome  | EUR      | 170     | 109292     | 2899753                                          | 0.933                                      | 0.042     | 889226                                           | 0.815                                      | 0.23      | 172227                                  | 0.046                                      | 0.997     |
|                                                                             | UKB Freeze 450        | EUR      | 1703    | 399240     | 6411484                                          | 0.849                                      | 0.126     | 2074846                                          | 0.622                                      | 0.555     | 166323                                  | 0.000                                      | 1.004     |
|                                                                             | Meta-analysis         | ALL      | 2085    | 534965     | 8053662                                          | 0.832                                      | 0.126     | 2833904                                          | 0.599                                      | 0.554     | 352116                                  | 0.043                                      | 1.02      |
| COVID19_positive_hospitalized_vs_COVID19_positive_not_hospitalized_combined | UPENN-PMBB Freeze One | AFR      | 67      | 99         | NA                                               | NA                                         | NA        | NA                                               | NA                                         | NA        | 330315                                  | 0.012                                      | 0.183     |
|                                                                             | GHS Freeze 145 Exome  | EUR      | 170     | 664        | 209299                                           | 0.549                                      | 0.866     | NA                                               | NA                                         | NA        | 173449                                  | 0.035                                      | 1.079     |
|                                                                             | UKB Freeze 450        | EUR      | 1703    | 5030       | 424564                                           | 0.072                                      | 1.099     | 112045                                           | 0.000                                      | 1.043     | 166403                                  | 0.000                                      | 1.037     |
|                                                                             | Meta-analysis         | ALL      | 1940    | 5793       | 462977                                           | 0.126                                      | 1.017     | 128932                                           | 0.000                                      | 1.021     | 398264                                  | 0.009                                      | 0.388     |
| COVID19_positive_not_hospitalized_vs_COVID19_negative_or_unknown_combined   | UPENN-PMBB Freeze One | AFR      | 99      | 8738       | 893407                                           | 0.796                                      | 0.338     | 280294                                           | 0.596                                      | 0.992     | 487296                                  | 0.076                                      | 0.961     |
|                                                                             | UKB Freeze 450        | AFR      | 134     | 8495       | 816964                                           | 0.736                                      | 0.48      | 250786                                           | 0.492                                      | 1.218     | 379423                                  | 0.050                                      | 0.998     |
|                                                                             | UKB Freeze 450        | SAS      | 236     | 9200       | 808557                                           | 0.652                                      | 0.622     | 226850                                           | 0.325                                      | 1.326     | 227147                                  | 0.016                                      | 1.016     |
|                                                                             | GHS Freeze 145 Exome  | EUR      | 664     | 109292     | 2907752                                          | 0.824                                      | 0.167     | 892254                                           | 0.559                                      | 0.731     | 172221                                  | 0.001                                      | 1.016     |
|                                                                             | UKB Freeze 450        | EUR      | 5030    | 399240     | 6440585                                          | 0.722                                      | 0.345     | 2086994                                          | 0.387                                      | 1.074     | 166350                                  | 0.000                                      | 1.019     |
|                                                                             | Meta-analysis         | ALL      | 6163    | 534965     | 8091286                                          | 0.710                                      | 0.345     | 2849393                                          | 0.385                                      | 1.059     | 351738                                  | 0.020                                      | 0.982     |
| COVID19_positive_severe_vs_COVID19_negative_or_unknown_combined             | UKB Freeze 450        | SAS      | 18      | 9200       | 796240                                           | 0.961                                      | 0.04      | 222161                                           | 0.910                                      | 0.163     | 226990                                  | 0.496                                      | 0.749     |
|                                                                             | UKB Freeze 450        | AFR      | 33      | 8495       | 811241                                           | 0.919                                      | 0.132     | 248076                                           | 0.831                                      | 0.346     | 379346                                  | 0.302                                      | 0.821     |
|                                                                             | GHS Freeze 145 Exome  | EUR      | 49      | 109292     | 2895469                                          | 0.976                                      | 0.013     | 888545                                           | 0.932                                      | 0.08      | 172229                                  | 0.246                                      | 0.785     |
|                                                                             | UKB Freeze 450        | EUR      | 490     | 399240     | 6400400                                          | 0.931                                      | 0.034     | 2070233                                          | 0.812                                      | 0.176     | 166321                                  | 0.001                                      | 1.02      |
|                                                                             | Meta-analysis         | ALL      | 590     | 526227     | 7876462                                          | 0.917                                      | 0.037     | 2721522                                          | 0.783                                      | 0.214     | 225588                                  | 0.090                                      | 0.889     |
|                                                                             | UKB Freeze 450        | AFR      | 33      | 134        | NA                                               | NA                                         | NA        | NA                                               | NA                                         | NA        | 235941                                  | 0.109                                      | 0.234     |
| COVID19_positive_severe_vs_COVID19_positive_not_hospitalized_combined       | GHS Freeze 145 Exome  | EUR      | 49      | 664        | 194798                                           | 0.818                                      | 0.273     | NA                                               | NA                                         | NA        | 170209                                  | 0.228                                      | 1.141     |
|                                                                             | UKB Freeze 450        | EUR      | 490     | 5030       | 373269                                           | 0.327                                      | 1.078     | 87177                                            | 0.043                                      | 1.013     | 166184                                  | 0.001                                      | 0.998     |
|                                                                             | Meta-analysis         | ALL      | 572     | 5828       | 410271                                           | 0.365                                      | 0.912     | 101899                                           | 0.035                                      | 0.968     | 301689                                  | 0.056                                      | 0.593     |
|                                                                             | UPENN-PMBB Freeze One | AFR      | 166     | 959        | 195274                                           | 0.331                                      | 1.345     | NA                                               | NA                                         | NA        | 484596                                  | 0.023                                      | 0.974     |
| COVID19_positive_vs_COVID19_negative_combined                               | UKB Freeze 450        | AFR      | 214     | 766        | 141313                                           | 0.206                                      | 1.071     | NA                                               | NA                                         | NA        | 387132                                  | 0.013                                      | 0.938     |
|                                                                             | UKB Freeze 450        | SAS      | 301     | 844        | 149617                                           | 0.129                                      | 1.111     | NA                                               | NA                                         | NA        | 228543                                  | 0.004                                      | 1.07      |
|                                                                             | GHS Freeze 145 Exome  | EUR      | 834     | 15574      | 896282                                           | 0.505                                      | 0.889     | 239671                                           | 0.091                                      | 1.024     | 172248                                  | 0.000                                      | 1.019     |
|                                                                             | UKB Freeze 450        | EUR      | 6733    | 31257      | 1361423                                          | 0.143                                      | 1.15      | 417941                                           | 0.001                                      | 1.015     | 166646                                  | 0.000                                      | 1         |
|                                                                             | Meta-analysis         | ALL      | 8248    | 49400      | 1745716                                          | 0.203                                      | 1.023     | 575968                                           | 0.005                                      | 1.025     | 471978                                  | 0.006                                      | 0.984     |
|                                                                             | UPENN-PMBB Freeze One | AFR      | 166     | 8738       | 897805                                           | 0.700                                      | 0.519     | 282679                                           | 0.434                                      | 1.219     | 486918                                  | 0.029                                      | 0.972     |
| COVID19_positive_vs_COVID19_negative_or_unknown_combined                    | UKB Freeze 450        | AFR      | 214     | 8495       | 821371                                           | 0.636                                      | 0.666     | 253263                                           | 0.335                                      | 1.356     | 379070                                  | 0.015                                      | 1.02      |
|                                                                             | UKB Freeze 450        | SAS      | 301     | 9200       | 812263                                           | 0.595                                      | 0.735     | 228572                                           | 0.246                                      | 1.267     | 226861                                  | 0.007                                      | 1.012     |
|                                                                             | GHS Freeze 145 Exome  | EUR      | 834     | 109292     | 2910461                                          | 0.799                                      | 0.205     | 893247                                           | 0.509                                      | 0.844     | 172192                                  | 0.001                                      | 1.026     |
|                                                                             | UKB Freeze 450        | EUR      | 6733    | 399240     | 6455895                                          | 0.675                                      | 0.446     | 2093385                                          | 0.315                                      | 1.175     | 166339                                  | 0.000                                      | 1.017     |
|                                                                             | Meta-analysis         | ALL      | 8248    | 534965     | 8111082                                          | 0.663                                      | 0.443     | 2857926                                          | 0.315                                      | 1.161     | 351576                                  | 0.009                                      | 0.996     |

**Supplementary Table 5. Association between the COVID-19 hospitalization phenotype and 50 rare variants in the promoter of EEF2.**

| rs ID        | hg38                  | Effect allele | Odds ratio | 95% LCI     | 95% UCI  | SE      | P-value  | Effect allele frequency | N cases with 0112 copies of effect allele | N controls with 0112 copies of effect allele | Studies analyzed                                                                                   |
|--------------|-----------------------|---------------|------------|-------------|----------|---------|----------|-------------------------|-------------------------------------------|----------------------------------------------|----------------------------------------------------------------------------------------------------|
| rs532051930  | 19:3985461:G:A        | A             | 93.9065    | 20.2954     | 434.505  | 0.7816  | 6.18E-09 | 2.55E-05                | 1869/410                                  | 5085102220                                   | GHS Freeze 145 MegaFreeze EUR UKB Freeze 450 EUR Meta                                              |
| rs374797871  | 19:3985414:A:G        | G             | 24.2157    | 1.84809     | 317.299  | 1.3127  | 0.0152   | 0.000547                | 146/110                                   | 172151810                                    | UKB Freeze 450 AFR UPENN-PMBB Freeze One AFR Meta                                                  |
| rs754033543  | 19:3985383:T:C        | C             | 18.9215    | 1.73245     | 206.658  | 1.2198  | 0.0159   | 0.00027                 | 1702/110                                  | 3992192110                                   | UKB Freeze 450 EUR Meta                                                                            |
| rs542049090  | 19:3985437:A:G        | G             | 18.6529    | 1.72231     | 202.014  | 1.2155  | 0.0161   | 0.00026                 | 1769/110                                  | 4079472000                                   | UKB Freeze 450 EUR UPENN-PMBB Freeze One AFR Meta                                                  |
| rs897131413  | 19:3985457:G:C        | C             | 17.7894    | 1.63807     | 193.191  | 1.2169  | 0.0180   | 0.00047                 | 1872/110                                  | 5084777470                                   | GHS Freeze 145 MegaFreeze EUR UKB Freeze 450 EUR Meta                                              |
| rs370100022  | 19:3985421:G:A        | A             | 5.21063    | 1.10233     | 24.6302  | 0.7925  | 0.0373   | 0.000140                | 1936/210                                  | 5175851440                                   | GHS Freeze 145 MegaFreeze EUR UKB Freeze 450 EUR UKB Freeze 450 SAS Meta                           |
| rs546488032  | 19:3985433:G:A        | A             | 6.19102    | 0.776398    | 49.3674  | 1.0593  | 0.0852   | 0.000057                | 1937/110                                  | 5176711561                                   | GHS Freeze 145 MegaFreeze EUR UKB Freeze 450 EUR UKB Freeze 450 SAS Meta                           |
| rs201347619  | 19:3985401:T:A        | A             | 0.364401   | 0.0678296   | 1.95767  | 0.8578  | 0.2393   | 0.004028                | 147/010                                   | 1709411381                                   | UKB Freeze 450 AFR UPENN-PMBB Freeze One AFR Meta                                                  |
| rs369523513  | 19:3985436:G:A        | A             | 0.36233    | 0.0593301   | 2.21276  | 0.9232  | 0.2715   | 0.000116                | 2020/010                                  | 5255961201                                   | GHS Freeze 145 MegaFreeze EUR UKB Freeze 450 AFR UKB Freeze 450 EUR UPENN-PMBB Freeze One AFR Meta |
| rs373888946  | 19:3985451:G:T        | T             | 0.363709   | 0.0429819   | 3.07768  | 1.0896  | 0.3533   | 0.00204                 | 1873/010                                  | 5083192080                                   | GHS Freeze 145 MegaFreeze EUR UKB Freeze 450 EUR Meta                                              |
| rs907273439  | 19:3985443:G:C        | C             | 2.35632    | 0.354027    | 15.6831  | 0.9671  | 0.3755   | 0.000234                | 1871/210                                  | 5082702370                                   | GHS Freeze 145 MegaFreeze EUR UKB Freeze 450 EUR Meta                                              |
| rs190787427  | 19:3985426:G:C        | C             | 0.361534   | 0.0260517   | 5.0172   | 1.342   | 0.4484   | 0.000117                | 1938/010                                  | 5175651220                                   | GHS Freeze 145 MegaFreeze EUR UKB Freeze 450 EUR UKB Freeze 450 SAS Meta                           |
| rs377104055  | 19:3985429:T:C        | C             | 0.361136   | 0.0234969   | 5.55049  | 1.3941  | 0.4650   | 0.000087                | 1850/010                                  | 4164000730                                   | UKB Freeze 450 AFR UKB Freeze 450 EUR UPENN-PMBB Freeze One AFR Meta                               |
| rs200921166  | 19:3985402:C:T        | T             | 0.360523   | 0.00840259  | 15.4686  | 1.9179  | 0.5948   | 0.000064                | 1703/010                                  | 3991875110                                   | UKB Freeze 450 EUR Meta                                                                            |
| rs774095261  | 19:3985425:C:A        | A             | 0.352361   | 0.00521284  | 23.8177  | 2.1498  | 0.6275   | 0.000020                | 1850/010                                  | 4164371710                                   | UKB Freeze 450 AFR UKB Freeze 450 EUR UPENN-PMBB Freeze One AFR Meta                               |
| rs529755390  | 19:3985441:T:C        | C             | 0.361172   | 0.00447913  | 29.123   | 2.2398  | 0.6493   | 0.000049                | 1873/010                                  | 5083685000                                   | GHS Freeze 145 MegaFreeze EUR UKB Freeze 450 EUR Meta                                              |
| rs77439048   | 19:3985423:A:C        | C             | 0.377494   | 0.00480048  | 29.6849  | 2.227   | 0.6618   | 0.000062                | 1873/010                                  | 5084576300                                   | GHS Freeze 145 MegaFreeze EUR UKB Freeze 450 EUR Meta                                              |
| rs1196793724 | 19:3985434:C:G        | G             | 0.364183   | 0.00328972  | 40.3162  | 2.4015  | 0.6740   | 0.000044                | 1703/010                                  | 3992023550                                   | UKB Freeze 450 EUR Meta                                                                            |
| rs529755390  | 19:3985441:T:A        | A             | 0.364438   | 0.0027381   | 48.5061  | 2.4955  | 0.6859   | 0.000047                | 1703/010                                  | 3991191380                                   | UKB Freeze 450 EUR Meta                                                                            |
| NA           | rs5441:T:TCGCCGGCCAGC | CGCCGAC       | 0.364656   | 0.00182461  | 72.878   | 2.7029  | 0.7090   | 0.000044                | 1873/010                                  | 5083684550                                   | GHS Freeze 145 MegaFreeze EUR UKB Freeze 450 EUR Meta                                              |
| rs190787427  | 19:3985426:G:A        | A             | 0.365569   | 0.00170724  | 78.2788  | 2.7381  | 0.7132   | 0.000042                | 1703/010                                  | 3991203400                                   | UKB Freeze 450 EUR Meta                                                                            |
| rs1280637004 | 19:3985463:G:A        | A             | 0.364255   | 0.000412394 | 321.736  | 3.4611  | 0.7704   | 0.000024                | 1703/010                                  | 3992151190                                   | UKB Freeze 450 EUR Meta                                                                            |
| rs363082396  | 19:3985435:C:A        | A             | 0.364183   | 0.000353722 | 374.953  | 3.5393  | 0.7753   | 0.000034                | 1873/010                                  | 5084683550                                   | GHS Freeze 145 MegaFreeze EUR UKB Freeze 450 EUR Meta                                              |
| NA           | 19:3985425:C:G        | G             | 0.364111   | 0.000282174 | 469.838  | 3.6545  | 0.7822   | 0.000021                | 1703/010                                  | 3992171710                                   | UKB Freeze 450 EUR Meta                                                                            |
| rs374912847  | 19:3985392:G:A        | A             | 0.362584   | 0.000204629 | 642.464  | 3.8163  | 0.7904   | 0.000014                | 1703/010                                  | 3992291110                                   | UKB Freeze 450 EUR Meta                                                                            |
| NA           | 19:3985455:G:A        | A             | 0.363455   | 0.000175147 | 754.222  | 3.8969  | 0.7951   | 0.000016                | 1703/010                                  | 3992271130                                   | UKB Freeze 450 EUR Meta                                                                            |
| rs750678552  | 19:3985430:C:G        | G             | 0.359112   | 0.000113616 | 1135.11  | 4.1116  | 0.8033   | 0.000432                | 65/010                                    | 919280                                       | UKB Freeze 450 SAS Meta                                                                            |
| rs776567094  | 19:3985428:G:A        | A             | 0.365423   | 6.02E-05    | 2218.87  | 4.4447  | 0.8208   | 0.000019                | 1703/010                                  | 3992181510                                   | UKB Freeze 450 EUR Meta                                                                            |
| rs369523513  | 19:3985436:G:C        | C             | 0.366851   | 5.09E-05    | 2645.82  | 4.5325  | 0.8249   | 0.000018                | 1873/010                                  | 5084621180                                   | GHS Freeze 145 MegaFreeze EUR UKB Freeze 450 EUR Meta                                              |
| NA           | 19:3985417:G:C        | C             | 0.363855   | 2.93E-05    | 4571.18  | 4.8096  | 0.8335   | 0.000014                | 1703/010                                  | 3992241110                                   | UKB Freeze 450 EUR Meta                                                                            |
| rs1027642860 | 19:3985460:A:C        | C             | 0.36092    | 1.49E-05    | 8736.83  | 5.1503  | 0.8431   | 0.000009                | 1703/010                                  | 3992297100                                   | UKB Freeze 450 EUR Meta                                                                            |
| rs779559837  | 19:3985438:G:A        | A             | 0.391097   | 3.10E-05    | 4928.25  | 4.8172  | 0.8455   | 0.000110                | 170/010                                   | 1092512400                                   | GHS Freeze 145 MegaFreeze EUR Meta                                                                 |
| NA           | 19:3985444:C:T        | T             | 0.382166   | 1.81E-05    | 8071.45  | 5.0807  | 0.8498   | 0.000022                | 1873/010                                  | 5084852220                                   | GHS Freeze 145 MegaFreeze EUR UKB Freeze 450 EUR Meta                                              |
| rs776029459  | 19:3985405:C:G        | G             | 0.374486   | 1.16E-05    | 12130.2  | 5.2989  | 0.8530   | 0.000017                | 1873/010                                  | 5085131170                                   | GHS Freeze 145 MegaFreeze EUR UKB Freeze 450 EUR Meta                                              |
| NA           | 19:3985411:A:G        | G             | 0.364948   | 5.36E-06    | 24871    | 5.6784  | 0.8591   | 0.000006                | 1703/010                                  | 3992315100                                   | UKB Freeze 450 EUR Meta                                                                            |
| rs995814367  | 19:3985458:G:A        | A             | 0.365204   | 3.21E-06    | 41519    | 5.9395  | 0.8653   | 0.000012                | 1703/010                                  | 3992291000                                   | UKB Freeze 450 EUR Meta                                                                            |
| rs764194249  | 19:3985408:G:A        | A             | 0.365204   | 2.04E-06    | 65358.2  | 6.171   | 0.8703   | 0.000006                | 1703/010                                  | 3992345100                                   | UKB Freeze 450 EUR Meta                                                                            |
| NA           | 19:3985442:G:A        | A             | 0.366228   | 1.12E-06    | 119957   | 6.4794  | 0.8768   | 0.000009                | 1703/010                                  | 3992237100                                   | UKB Freeze 450 EUR Meta                                                                            |
| rs77439048   | 19:3985423:A:G        | G             | 0.366667   | 6.02E-07    | 223245   | 6.7957  | 0.8826   | 0.000015                | 1703/010                                  | 3992231120                                   | UKB Freeze 450 EUR Meta                                                                            |
| rs886610889  | 19:3985452:A:ACGG     | ACCG          | 0.383391   | 9.78E-07    | 150305   | 6.5711  | 0.8840   | 0.000046                | 170/010                                   | 1092731000                                   | GHS Freeze 145 MegaFreeze EUR Meta                                                                 |
| rs748898673  | 19:3985399:A:C        | C             | 0.366228   | 4.01E-07    | 334091   | 7.002   | 0.8859   | 0.000009                | 1703/010                                  | 3992337100                                   | UKB Freeze 450 EUR Meta                                                                            |
| rs560636284  | 19:3985439:G:A        | A             | 0.92441    | 0.310456    | 2.75251  | 0.5567  | 0.8877   | 0.000897                | 1870.310                                  | 5075939130                                   | GHS Freeze 145 MegaFreeze EUR UKB Freeze 450 EUR Meta                                              |
| rs776567094  | 19:3985428:G:C        | C             | 0.365825   | 2.96E-07    | 451572   | 7.1563  | 0.8882   | 0.000009                | 1703/010                                  | 3992181710                                   | UKB Freeze 450 EUR Meta                                                                            |
| rs1019385884 | 19:3985467:G:A        | A             | 0.366008   | 2.35E-07    | 569136   | 7.2741  | 0.8901   | 0.000007                | 1703/010                                  | 3992296600                                   | UKB Freeze 450 EUR Meta                                                                            |
| rs1037024876 | 19:3985452:A:G        | G             | 0.34294    | 5.19E-08    | 2.24E+06 | 8.0119  | 0.8937   | 0.000023                | 1700/010                                  | 1092731510                                   | GHS Freeze 145 MegaFreeze EUR Meta                                                                 |
| rs754780163  | 19:3985431:G:A        | A             | 0.366888   | 1.38E-07    | 973791   | 7.5469  | 0.8943   | 0.000012                | 1703/010                                  | 3992271000                                   | UKB Freeze 450 EUR Meta                                                                            |
| NA           | 19:3985432:C:G        | G             | 0.367034   | 7.63E-10    | 1.77E+08 | 10.2002 | 0.9217   | 0.000006                | 1703/010                                  | 3992335100                                   | UKB Freeze 450 EUR Meta                                                                            |
| NA           | 19:3985449:A:G        | G             | 0.375987   | 7.77E-10    | 1.82E+08 | 10.2028 | 0.9236   | 0.000027                | 1700/010                                  | 1092828600                                   | GHS Freeze 145 MegaFreeze EUR Meta                                                                 |
| NA           | 19:3985446:G:A        | A             | 0.367402   | 2.56E-13    | 5.28E+11 | 14.2826 | 0.9441   | 0.000006                | 1703/010                                  | 3992325100                                   | UKB Freeze 450 EUR Meta                                                                            |
| rs373344045  | 19:3985424:G:A        | A             | 1.06354    | 0.140046    | 8.07673  | 1.0344  | 0.9525   | 0.000243                | 1872/110                                  | 5082832470                                   | GHS Freeze 145 MegaFreeze EUR UKB Freeze 450 EUR Meta                                              |



**Supplementary Table 6. Evidence for association between the COVID-19 hospitalization phenotype and rs532051930 across different association tests.**

| Approach    | Association test in individual studies             | Approach used to combine results across studies | Association in UKB Europeans |      |          | Association in GHS Europeans |      |          | Association in UKB+GHS Europeans  |                                   |                                   |          |  |  |                                   |  |  |
|-------------|----------------------------------------------------|-------------------------------------------------|------------------------------|------|----------|------------------------------|------|----------|-----------------------------------|-----------------------------------|-----------------------------------|----------|--|--|-----------------------------------|--|--|
|             |                                                    |                                                 | OR (95% CI)                  | SE*  | P-value  | OR (95% CI)                  | SE*  | P-value  | OR (95% CI)                       | SE*                               | P-value                           |          |  |  |                                   |  |  |
| 1 (default) | REGENIE Firth exact test, with covariates and LOCO | Inverse-variance fixed-effects meta-analysis    | 80.9 (13.1 - 499.5)          | 0.93 | 2.20E-06 | 134.8 (7.9 - 2301.3)         | 1.45 | 7.07E-04 | 93.9 (20.3 - 434.5) 0.78 6.17E-09 |                                   |                                   |          |  |  |                                   |  |  |
| 2           |                                                    | Sample size weighted meta-analysis              |                              |      |          |                              |      |          | NA                                |                                   |                                   | 3.14E-08 |  |  |                                   |  |  |
| 3           |                                                    | Meta-analysis of log-likelihood curves          |                              |      |          |                              |      |          | 85.6 (17.2 - 425.8) 0.82 5.51E-08 |                                   |                                   |          |  |  |                                   |  |  |
| 4           |                                                    | Firth exact test, no covariates                 |                              |      |          |                              |      |          | 65.7 (16.9 - 195.3) 0.90 3.49E-06 | 92.1 (9.9 - 395.0) 1.4 0.00127    | 72.5 (16.4 - 321.0) 0.76 1.64E-08 |          |  |  |                                   |  |  |
| 5           |                                                    | Fisher's exact test (no covariates)             |                              |      |          |                              |      |          | 58.7 (10.6 - 218.5) 0.98 3.35E-05 | 64.6 (1.48 - 456.8) 1.75 0.017    | 60.1 (11.2 - 321.6) 0.86 1.70E-06 |          |  |  |                                   |  |  |
| 6           |                                                    | Logistic regression, with covariates            |                              |      |          |                              |      |          | 71.6 (15.6 - 241.7) 0.99 1.55E-05 | 106.5 (5.61 - 648.2) 1.74 0.00733 | 78.9 (14.6 - 425.0) 0.86 3.73E-07 |          |  |  |                                   |  |  |
| 7           |                                                    | Logistic regression, no covariates              |                              |      |          |                              |      |          | 58.7 (13.4 - 185.0) 0.96 2.37E-05 | 64.7 (3.51 - 340.4) 1.67 0.0123   | 60.2 (11.7 - 308.4) 0.83 9.00E-07 |          |  |  |                                   |  |  |
| 8           |                                                    | BinomiRare test, with covariates                |                              |      |          |                              |      |          | Meta-analysis                     |                                   |                                   | NA       |  |  | NA 2.96E-07                       |  |  |
| 9           |                                                    | Firth exact test, with covariates               |                              |      |          |                              |      |          | Mega-analysis (UKB+GHS combined)  |                                   |                                   | NA       |  |  | 85.8 (17.2 - 427.2) 0.82 5.48E-08 |  |  |
| 10          |                                                    | Firth exact test, no covariates                 |                              |      |          |                              |      |          |                                   |                                   |                                   |          |  |  | 54.4 (11.8 - 250.5) 0.78 2.91E-07 |  |  |
| 11          |                                                    | Fisher's exact test (no covariates)             |                              |      |          |                              |      |          |                                   |                                   |                                   |          |  |  | 49.4 (9.7 - 251.0) 0.83 2.53E-06  |  |  |
| 12          |                                                    | Logistic regression, with covariates            |                              |      |          |                              |      |          |                                   |                                   |                                   |          |  |  | 78.7 (14.6 - 424.9) 0.86 3.88E-07 |  |  |
| 13          |                                                    | Logistic regression, no covariates              |                              |      |          |                              |      |          |                                   |                                   |                                   |          |  |  | 49.5 (9.9 - 246.2) 0.82 1.89E-06  |  |  |

\*Re-calculated from the OR and p-value

**Supplementary Table 7. No carriers of the rare variant rs532051930 in the promoter of EEF2 were observed in an additional 4,341 individuals with COVID-19.**

| Study                                | Reference                                                                                                                                 | N COVID-19 cases |              |        |             |         |       |                         | Heterozygote for rs532051930:A |   |
|--------------------------------------|-------------------------------------------------------------------------------------------------------------------------------------------|------------------|--------------|--------|-------------|---------|-------|-------------------------|--------------------------------|---|
|                                      |                                                                                                                                           | Total            | Hospitalized | Severe | Of European | African | Asian | Hispanic/other ancestry |                                |   |
| GenOMICC                             | PMID 33307546                                                                                                                             | 2969             | 2969         | 2969   | 2110        | 145     | 375   | NA                      | 339                            | 0 |
| Columbia University COVID-19 Biobank | <a href="https://www.medrxiv.org/content/10.1101/2020.12.18.20248226v2">https://www.medrxiv.org/content/10.1101/2020.12.18.20248226v2</a> | 1152             | 1082         | 479    | 67          | 463     | 33    | 506                     | 83                             | 0 |
| Biobanque Québec Covid-19            | <a href="https://www.medrxiv.org/content/10.1101/2020.12.18.20248226v2">https://www.medrxiv.org/content/10.1101/2020.12.18.20248226v2</a> | 220              | 128          | 62     | 154         | 30      | 29    | 7                       | 0                              | 0 |

**Supplementary Table 8. Results from burden association tests for 167 genes located in eight loci described by Horowitz et al. (2021).**

| Trait                                                        | Gene                | Burden test | MAF | Odds Ratio [95% CI] | P-value  | N cases with RRR/AA genotype <sup>a</sup> | N controls with RRR/AA genotype <sup>a</sup> | AAF     | GWAS SNP        | Distance to GWAS SNP, bp | Distance to GWAS SNP, rank |
|--------------------------------------------------------------|---------------------|-------------|-----|---------------------|----------|-------------------------------------------|----------------------------------------------|---------|-----------------|--------------------------|----------------------------|
| COVID19 positive hospitalized vs COVID19 negative or unknown | <i>CHAF1A</i>       | M1          | <1% | 25.2164.947.128.539 | 1.00E-04 | 1935/30                                   | 517687/450                                   | 0.00005 | 19:4719431:G:A  | 316669                   | 16                         |
| COVID19 positive hospitalized vs COVID19 negative or unknown | <i>CHAF1A</i>       | M3          | <1% | 25.2164.947.128.539 | 1.00E-04 | 1935/30                                   | 517687/450                                   | 0.00005 | 19:4719431:G:A  | 316669                   | 16                         |
| COVID19 positive hospitalized vs COVID19 negative or unknown | <i>SLC22A31</i>     | M1          | <1% | 5.5831.807.17.256   | 2.80E-03 | 1844/60                                   | 4160714020                                   | 0.00049 | 16:89117727     | 78271                    | 3                          |
| COVID19 positive hospitalized vs COVID19 negative or unknown | <i>SLC22A31</i>     | M3          | <1% | 5.5831.807.17.256   | 2.80E-03 | 1844/60                                   | 4160714020                                   | 0.00049 | 16:89117727     | 78271                    | 3                          |
| COVID19 positive hospitalized vs COVID19 negative or unknown | <i>SARDH</i>        | M1          | <1% | 2.3671.315.4.259    | 4.00E-03 | 20721/21                                  | 53347714871                                  | 0.0014  | 9:133270015:A:C | 393873                   | 25                         |
| COVID19 positive hospitalized vs COVID19 negative or unknown | <i>SHD</i>          | M1          | <1% | 5.2831.619.17.242   | 5.80E-03 | 1869/40                                   | 5082902420                                   | 0.00024 | 19:4719431:G:A  | 439368                   | 22                         |
| COVID19 positive hospitalized vs COVID19 negative or unknown | <i>CTB-SOL17.10</i> | M1          | <1% | 5.7261.598.20.518   | 7.40E-03 | 2017/30                                   | 5256251400                                   | 0.00014 | 19:4719431:G:A  | 247081                   | 13                         |
| COVID19 positive hospitalized vs COVID19 negative or unknown | <i>CTB-SOL17.10</i> | M3          | <1% | 5.7261.598.20.518   | 7.40E-03 | 2017/30                                   | 5256251400                                   | 0.00014 | 19:4719431:G:A  | 247081                   | 13                         |
| COVID19 positive hospitalized vs COVID19 negative or unknown | <i>DBH</i>          | M1          | <1% | 0.3200.128.0.796    | 1.40E-02 | 2083/20                                   | 53276122040                                  | 0.00205 | 9:133270015:A:C | 366356                   | 22                         |
| COVID19 positive hospitalized vs COVID19 negative or unknown | <i>SIGLEC14</i>     | M1          | <1% | 6.5441.434.29.868   | 1.50E-02 | 1936/20                                   | 5176259512                                   | 0.00012 | 19:51739497     | 96143                    | 6                          |
| COVID19 positive hospitalized vs COVID19 negative or unknown | <i>OLIG2</i>        | M1          | <1% | 12.0461.255.115.574 | 3.10E-02 | 1872/10                                   | 508456760                                    | 0.00008 | 21:33252612:A:G | 225750                   | 7                          |
| COVID19 positive hospitalized vs COVID19 negative or unknown | <i>OLIG2</i>        | M3          | <1% | 12.0461.255.115.574 | 3.10E-02 | 1872/10                                   | 508456760                                    | 0.00008 | 21:33252612:A:G | 225750                   | 7                          |
| COVID19 positive hospitalized vs COVID19 negative or unknown | <i>PSORS1C2</i>     | M1          | <1% | 5.1761.151.23.275   | 3.20E-02 | 1871/20                                   | 5083501820                                   | 0.00018 | 6:31153649:G:A  | 15699                    | 4                          |
| COVID19 positive hospitalized vs COVID19 negative or unknown | <i>PPP2R1A</i>      | M3          | <1% | 5.4291.129.26.105   | 3.50E-02 | 1871/20                                   | 5083771950                                   | 0.00019 | 19:51739497     | 450599                   | 33                         |
| COVID19 positive hospitalized vs COVID19 negative or unknown | <i>SH3GL1</i>       | M1          | <1% | 10.8041.173.99.499  | 3.60E-02 | 1872/10                                   | 508459730                                    | 0.00007 | 19:4719431:G:A  | 357832                   | 17                         |
| COVID19 positive hospitalized vs COVID19 negative or unknown | <i>MCB</i>          | M1          | <1% | 2.1061.007.4.401    | 4.80E-02 | 2077/80                                   | 53392110431                                  | 0.00098 | 6:31153649:G:A  | 344544                   | 18                         |
| COVID19 positive hospitalized vs COVID19 negative or unknown | <i>MCB</i>          | M3          | <1% | 2.1061.007.4.401    | 4.80E-02 | 2077/80                                   | 53392110431                                  | 0.00098 | 6:31153649:G:A  | 344544                   | 18                         |
| COVID19 positive hospitalized vs COVID19 negative or unknown | <i>ATP6V1G2</i>     | M1          | <1% | 8.5960.965.76.602   | 5.40E-02 | 1872/10                                   | 508475570                                    | 0.00006 | 6:31153649:G:A  | 391758                   | 21                         |
| COVID19 positive hospitalized vs COVID19 negative or unknown | <i>ATP6V1G2</i>     | M3          | <1% | 8.5960.965.76.602   | 5.40E-02 | 1872/10                                   | 508475570                                    | 0.00006 | 6:31153649:G:A  | 391758                   | 21                         |
| COVID19 positive hospitalized vs COVID19 negative or unknown | <i>SRFBF6</i>       | M1          | <1% | 5.0250.971.25.993   | 5.40E-02 | 2016/20                                   | 5259752520                                   | 0.00024 | 9:133270015:A:C | 61853                    | 2                          |
| COVID19 positive hospitalized vs COVID19 negative or unknown | <i>MYDGF</i>        | M3          | <1% | 0.3430.115.1.024    | 5.50E-02 | 2085/00                                   | 5344694960                                   | 0.00046 | 19:4719431:G:A  | 61427                    | 2                          |
| COVID19 positive hospitalized vs COVID19 negative or unknown | <i>XCR1</i>         | M1          | <1% | 3.0680.967.9.733    | 5.70E-02 | 2017/30                                   | 5254323330                                   | 0.00032 | 3:45859597:C:T  | 161348                   | 6                          |
| COVID19 positive hospitalized vs COVID19 negative or unknown | <i>C6orf15</i>      | M3          | <1% | 3.0030.965.9.351    | 5.80E-02 | 2016/40                                   | 5254652991                                   | 0.00029 | 6:31153649:G:A  | 42269                    | 6                          |
| COVID19 positive hospitalized vs COVID19 negative or unknown | <i>LARS2</i>        | M3          | <1% | 1.3550.987.1.861    | 6.00E-02 | 2036/481                                  | 52945998238                                  | 0.00941 | 3:45859597:C:T  | 465144                   | 11                         |
| COVID19 positive hospitalized vs COVID19 negative or unknown | <i>PRRC2A</i>       | M3          | <1% | 0.7160.505.1.016    | 6.10E-02 | 2063/220                                  | 529433100257                                 | 0.00937 | 6:31153649:G:A  | 469140                   | 34                         |
| COVID19 positive hospitalized vs COVID19 negative or unknown | <i>LIMD1</i>        | M3          | <1% | 2.2020.962.5.038    | 6.20E-02 | 2079/60                                   | 5340539120                                   | 0.00085 | 3:45859597:C:T  | 264718                   | 8                          |
| COVID19 positive hospitalized vs COVID19 negative or unknown | <i>FTFR1</i>        | M1          | <1% | 9.5210.887.102.209  | 6.30E-02 | 2019/10                                   | 525731340                                    | 0.00003 | 19:51739497     | 6444                     | 1                          |
| COVID19 positive hospitalized vs COVID19 negative or unknown | <i>SIGLEC14</i>     | M3          | <1% | 3.5350.936.13.249   | 6.30E-02 | 2093/20                                   | 52627319818                                  | 0.00021 | 19:51739497     | 96143                    | 6                          |
| COVID19 positive hospitalized vs COVID19 negative or unknown | <i>CTBA</i>         | M3          | <1% | 2.8430.930.8.693    | 6.70E-02 | 2080/50                                   | 5344055600                                   | 0.00053 | 16:89117727     | 474375                   | 20                         |
| COVID19 positive hospitalized vs COVID19 negative or unknown | <i>OLIG1</i>        | M1          | <1% | 7.3540.856.63.204   | 6.90E-02 | 1872/10                                   | 508454780                                    | 0.00008 | 21:33252612:A:G | 182366                   | 5                          |
| COVID19 positive hospitalized vs COVID19 negative or unknown | <i>OLIG1</i>        | M3          | <1% | 7.3540.856.63.204   | 6.90E-02 | 1872/10                                   | 508454780                                    | 0.00008 | 21:33252612:A:G | 182366                   | 5                          |
| COVID19 positive hospitalized vs COVID19 negative or unknown | <i>ZNF615</i>       | M1          | <1% | 0.3680.121.1.117    | 7.80E-02 | 2085/00                                   | 5341548101                                   | 0.00076 | 19:51739497     | 253382                   | 17                         |
| COVID19 positive hospitalized vs COVID19 negative or unknown | <i>ZNF615</i>       | M3          | <1% | 0.3680.121.1.117    | 7.80E-02 | 2085/00                                   | 5341548101                                   | 0.00076 | 19:51739497     | 253382                   | 17                         |
| COVID19 positive hospitalized vs COVID19 negative or unknown | <i>KDM4B</i>        | M3          | <1% | 2.1460.916.5.028    | 7.90E-02 | 2077/80                                   | 5318617781                                   | 0.00166 | 19:4719431:G:A  | 313459                   | 15                         |
| COVID19 positive hospitalized vs COVID19 negative or unknown | <i>CPNE7</i>        | M1          | <1% | 2.5090.871.7.222    | 8.80E-02 | 2079/60                                   | 5342237420                                   | 0.0007  | 16:89117727     | 458170                   | 18                         |
| COVID19 positive hospitalized vs COVID19 negative or unknown | <i>DBH</i>          | M3          | <1% | 0.8240.657.1.033    | 9.30E-02 | 2021/640                                  | 5140432088735                                | 0.01957 | 9:133270015:A:C | 366356                   | 22                         |
| COVID19 positive hospitalized vs COVID19 negative or unknown | <i>SURF1</i>        | M1          | <1% | 1.7340.905.3.321    | 9.70E-02 | 2075/100                                  | 53551145440                                  | 0.00136 | 9:133270015:A:C | 81897                    | 6                          |
| COVID19 positive hospitalized vs COVID19 negative or unknown | <i>CTSL</i>         | M1          | <1% | 2.0460.869.4.823    | 1.00E-01 | 2076/90                                   | 53271612472                                  | 0.00017 | 16:89117727     | 41119                    | 4                          |
| COVID19 positive hospitalized vs COVID19 negative or unknown | <i>FEM1A</i>        | M1          | <1% | 3.7780.670.21.285   | 1.30E-01 | 2015/30                                   | 5259143130                                   | 0.0003  | 19:4719431:G:A  | 72423                    | 4                          |
| COVID19 positive hospitalized vs COVID19 negative or unknown | <i>FEM1A</i>        | M3          | <1% | 3.7780.670.21.285   | 1.30E-01 | 2015/30                                   | 5259143130                                   | 0.0003  | 19:4719431:G:A  | 72423                    | 4                          |
| COVID19 positive hospitalized vs COVID19 negative or unknown | <i>LZTFL1</i>       | M3          | <1% | 2.5780.756.8.800    | 1.30E-01 | 2082/30                                   | 5345044601                                   | 0.00043 | 3:45859597:C:T  | 33284                    | 1                          |
| COVID19 positive hospitalized vs COVID19 negative or unknown | <i>SURF2</i>        | M3          | <1% | 0.4710.176.1.262    | 1.30E-01 | 2084/10                                   | 5340389270                                   | 0.00086 | 9:133270015:A:C | 86577                    | 7                          |
| COVID19 positive hospitalized vs COVID19 negative or unknown | <i>ARRDC5</i>       | M3          | <1% | 2.5130.744.8.487    | 1.40E-01 | 2080/50                                   | 5342637020                                   | 0.00066 | 19:4719431:G:A  | 171614                   | 7                          |
| COVID19 positive hospitalized vs COVID19 negative or unknown | <i>FLOT1</i>        | M3          | <1% | 1.9690.802.4.836    | 1.40E-01 | 2077/80                                   | 53372212421                                  | 0.00117 | 6:31153649:G:A  | 425534                   | 26                         |
| COVID19 positive hospitalized vs COVID19 negative or unknown | <i>GLON3</i>        | M1          | <1% | 19.0790.389.936.241 | 1.40E-01 | 1872/10                                   | 508458870                                    | 0.00009 | 19:51739497     | 427650                   | 32                         |
| COVID19 positive hospitalized vs COVID19 negative or unknown | <i>SLC6A20</i>      | M1          | <1% | 0.4620.161.1.328    | 1.50E-01 | 2085/00                                   | 5344619040                                   | 0.00084 | 3:45859597:C:T  | 101161                   | 5                          |
| COVID19 positive hospitalized vs COVID19 negative or unknown | <i>MAF7B</i>        | M3          | <1% | 0.4730.168.1.330    | 1.60E-01 | 2084/10                                   | 5340788870                                   | 0.00083 | 5:163300447     | 202947                   | 4                          |
| COVID19 positive hospitalized vs COVID19 negative or unknown | <i>SARDH</i>        | M3          | <1% | 1.2930.905.1.848    | 1.60E-01 | 2053/41                                   | 52807169913                                  | 0.00645 | 9:133270015:A:C | 393873                   | 25                         |
| COVID19 positive hospitalized vs COVID19 negative or unknown | <i>TSC1</i>         | M3          | <1% | 0.7410.490.1.121    | 1.60E-01 | 2069/160                                  | 52819067687                                  | 0.00633 | 9:133270015:A:C | 373781                   | 23                         |
| COVID19 positive hospitalized vs COVID19 negative or unknown | <i>MUC2J</i>        | M1          | <1% | 0.3670.086.1.555    | 1.70E-01 | 2020/00                                   | 5252635011                                   | 0.00048 | 6:31153649:G:A  | 169691                   | 10                         |
| COVID19 positive hospitalized vs COVID19 negative or unknown | <i>MUC2J</i>        | M3          | <1% | 0.3670.086.1.555    | 1.70E-01 | 2020/00                                   | 5252635011                                   | 0.00048 | 6:31153649:G:A  | 169691                   | 10                         |
| COVID19 positive hospitalized vs COVID19 negative or unknown | <i>PLIN5</i>        | M1          | <1% | 0.4860.172.1.374    | 1.70E-01 | 2084/10                                   | 5340329312                                   | 0.00087 | 19:4719431:G:A  | 195904                   | 11                         |
| COVID19 positive hospitalized vs COVID19 negative or unknown | <i>PLIN5</i>        | M3          | <1% | 0.4860.172.1.374    | 1.70E-01 | 2084/10                                   | 5340329312                                   | 0.00087 | 19:4719431:G:A  | 195904                   | 11                         |
| COVID19 positive hospitalized vs COVID19 negative or unknown | <i>LIMD1</i>        | M1          | <1% | 11.5390.303.439.203 | 1.90E-01 | 1872/10                                   | 5084311010                                   | 0.0001  | 3:45859597:C:T  | 264718                   | 8                          |
| COVID19 positive hospitalized vs COVID19 negative or unknown | <i>MVD</i>          | M1          | <1% | 0.3620.078.1.673    | 1.90E-01 | 1938/00                                   | 5173333990                                   | 0.00038 | 16:89117727     | 465203                   | 19                         |
| COVID19 positive hospitalized vs COVID19 negative or unknown | <i>NCR3</i>         | M3          | <1% | 0.3730.086.1.608    | 1.90E-01 | 2020/00                                   | 5253514140                                   | 0.00039 | 6:31153649:G:A  | 435417                   | 30                         |
| COVID19 positive hospitalized vs COVID19 negative or unknown | <i>RNF166</i>       | M3          | <1% | 2.0520.696.6.046    | 1.90E-01 | 2016/10                                   | 5251575980                                   | 0.00057 | 16:89117727     | 420160                   | 15                         |
| COVID19 positive hospitalized vs COVID19 negative or unknown | <i>SACML</i>        | M1          | <1% | 3.2930.554.19.385   | 1.90E-01 | 1937/10                                   | 5175841480                                   | 0.00014 | 3:45859597:C:T  | 170132                   | 7                          |
| COVID19 positive hospitalized vs COVID19 negative or unknown | <i>CCDC94</i>       | M1          | <1% | 3.7630.497.28.456   | 2.00E-01 | 2019/10                                   | 5256061590                                   | 0.00015 | 19:4719431:G:A  | 472285                   | 23                         |
| COVID19 positive hospitalized vs COVID19 negative or unknown | <i>SACML</i>        | M3          | <1% | 1.9820.690.5.692    | 2.00E-01 | 2080/50                                   | 534178861                                    | 0.00074 | 3:45859597:C:T  | 170132                   | 7                          |
| COVID19 positive hospitalized vs COVID19 negative or unknown | <i>TRAPP2L</i>      | M1          | <1% | 0.7590.498.1.158    | 2.00E-01 | 2069/160                                  | 528171678311                                 | 0.00635 | 16:89117727     | 260577                   | 8                          |
| COVID19 positive hospitalized vs COVID19 negative or unknown | <i>ZNF616</i>       | M1          | <1% | 0.4930.166.1.465    | 2.00E-01 | 2004/10                                   | 5255309400                                   | 0.00089 | 19:51739497     | 375320                   | 28                         |
| COVID19 positive hospitalized vs COVID19 negative or unknown | <i>ZNF616</i>       | M3          | <1% | 0.4930.166.1.465    | 2.00E-01 | 2004/10                                   | 5255309400                                   | 0.00089 | 19:51739497     | 375320                   | 28                         |
| COVID19 positive hospitalized vs COVID19 negative or unknown | <i>ZNF836</i>       | M1          | <1% | 0.3630.076.1.725    | 2.00E-01 | 2085/00                                   | 5346153500                                   | 0.00033 | 19:51739497     | 415374                   | 31                         |
| COVID19 positive hospitalized vs COVID19 negative or unknown | <i>ZNF836</i>       | M3          | <1% | 0.3630.076.1.725    | 2.00E-01 | 2085/00                                   | 5346153500                                   | 0.00033 | 19:51739497     | 415374                   | 31                         |
| COVID19 positive hospitalized vs COVID19 negative or unknown | <i>CEACAM18</i>     | M1          | <1% | 0.3650.075.1.733    | 2.10E-01 | 2005/00                                   | 5260424280                                   | 0.0004  | 19:51739497     | 260855                   | 18                         |
| COVID19 positive hospitalized vs COVID19 negative or unknown | <i>CEACAM18</i>     | M3          | <1% | 0.3650.075.1.733    | 2.10E-01 | 2005/00                                   | 5260424280                                   | 0.0004  | 19:51739497     | 260855                   | 18                         |
| COVID19 positive hospitalized vs COVID19 negative or unknown | <i>DNAK28</i>       | M1          | <1% | 0.5610.228.1.381    | 2.10E-01 | 2083/20                                   | 53383711280                                  | 0.00015 | 21:33252612:A:G | 235614                   | 8                          |
| COVID19 positive hospitalized vs COVID19 negative or unknown | <i>APRT</i>         | M3          | <1% | 0.5020.168.1.501    | 2.20E-01 | 2084/10                                   | 5341318340                                   | 0.00078 | 16:89117727     | 300830                   | 10                         |
| COVID19 positive hospitalized vs COVID19 negative or unknown | <i>BAG6</i>         | M3          | <1% | 0.7130.416.1.224    | 2.20E-01 | 2076/90                                   | 5316253373                                   | 0.00312 | 6:31153649:G:A  | 485481                   | 36                         |
| COVID19 positive hospitalized vs COVID19 negative or unknown | <i>HMMR</i>         | M3          | <1% | 0.6880.377.1.254    | 2.20E-01 | 2078/70                                   | 53222927306                                  | 0.00256 | 5:163300447     | 160245                   | 3                          |
| COVID19 positive hospitalized vs COVID19 negative or unknown | <i>SLC6A20</i>      | M3          | <1% | 0.7210.428.1.216    | 2.20E-01 | 2076/90                                   | 53123637272                                  | 0.00348 | 3:45859597:C:T  | 101161                   | 5                          |
| COVID19 positive hospitalized vs COVID19 negative or unknown | <i>SPAC49</i>       | M1          | <1% | 0.3680.075.1.806    | 2.20E-01 | 2085/00                                   | 5345234402                                   | 0.00041 | 9:133270015:A:C | 386068                   | 14                         |
| COVID19 positive hospitalized vs COVID19 negative or unknown | <i>VARS2</i>        | M1          | <1% | 0.7680.503.1.174    | 2.20E-01 | 2069/160                                  | 529226572910                                 | 0.00537 | 6:31153649:G:A  | 239238                   | 24                         |
| COVID19 positive hospitalized vs COVID19 negative or unknown | <i>ZNF841</i>       | M1          | <1% | 0.5620.225.1.399    | 2.20E-01 | 2083/20                                   | 53369412710                                  | 0.00119 | 19:51739497     | 325609                   | 22                         |
| COVID19 positive hospitalized vs COVID19 negative or unknown | <i>ZNF841</i>       | M3          | <1% | 0.5620.225.1.399    | 2.20E-01 | 2083/20                                   | 53369412710                                  | 0.00119 | 19:51739497     | 325609                   | 22                         |
| COVID19 positive hospitalized vs COVID19 negative or unknown | <i>DNR1</i>         | M1          | <1% | 0.3650.071.1.871    | 2.30E-01 | 1938/00                                   | 5173144180                                   | 0.0004  | 6:31153649:G:A  | 268430                   | 17                         |
| COVID19 positive hospitalized vs COVID19 negative or unknown | <i>FKBP1</i>        | M3          | <1% |                     |          |                                           |                                              |         |                 |                          |                            |

|                                                              |                   |    |      |                      |          |          |               |         |                 |        |    |
|--------------------------------------------------------------|-------------------|----|------|----------------------|----------|----------|---------------|---------|-----------------|--------|----|
| COVID19 positive hospitalized vs COVID19 negative or unknown | <i>SURF6</i>      | M3 | <-1% | 1.442(0.785,2.651)   | 2.40E-01 | 2071140  | 53257323884   | 0.00224 | 9-133270015:A:C | 61853  | 2  |
| COVID19 positive hospitalized vs COVID19 negative or unknown | <i>AC074141.1</i> | M1 | <-1% | 0.515(0.167,1.587)   | 2.50E-01 | 2084110  | 53424971511   | 0.00067 | 19-51739497     | 133034 | 9  |
| COVID19 positive hospitalized vs COVID19 negative or unknown | <i>AC074141.1</i> | M3 | <-1% | 0.515(0.167,1.587)   | 2.50E-01 | 2084110  | 53424971511   | 0.00067 | 19-51739497     | 133034 | 9  |
| COVID19 positive hospitalized vs COVID19 negative or unknown | <i>MED22</i>      | M1 | <-1% | 2.725(0.493,5.068)   | 2.50E-01 | 1872110  | 5083491930    | 0.00019 | 9-133270015:A:C | 71489  | 4  |
| COVID19 positive hospitalized vs COVID19 negative or unknown | <i>CXNGI</i>      | M3 | <-1% | 2.100(0.575,7.670)   | 2.60E-01 | 2081410  | 5343705950    | 0.00056 | 5-163300447     | 138009 | 1  |
| COVID19 positive hospitalized vs COVID19 negative or unknown | <i>MBXGF</i>      | M3 | <-1% | 0.315(0.042,3.346)   | 2.60E-01 | 2081410  | 5344773146    | 0.00018 | 19-4719431:G:A  | 61427  | 2  |
| COVID19 positive hospitalized vs COVID19 negative or unknown | <i>NCR3</i>       | M1 | <-1% | 0.363(0.063,2.083)   | 2.60E-01 | 1873100  | 5082313010    | 0.00029 | 6-31153649:G:A  | 435417 | 30 |
| COVID19 positive hospitalized vs COVID19 negative or unknown | <i>SON</i>        | M3 | <-1% | 1.154(0.897,1.483)   | 2.60E-01 | 20147010 | 5183731657022 | 0.01553 | 21-33252612:A:G | 290480 | 10 |
| COVID19 positive hospitalized vs COVID19 negative or unknown | <i>IFNAR2</i>     | M3 | <-1% | 1.968(0.598,6.469)   | 2.70E-01 | 2082310  | 5342587120    | 0.00067 | 21-33252612:A:G | 10690  | 1  |
| COVID19 positive hospitalized vs COVID19 negative or unknown | <i>SPG7</i>       | M1 | <-1% | 1.418(0.762,2.638)   | 2.70E-01 | 2075100  | 53298619781   | 0.00185 | 16-8911727      | 390690 | 12 |
| COVID19 positive hospitalized vs COVID19 negative or unknown | <i>GALNS</i>      | M1 | <-1% | 0.370(0.061,2.257)   | 2.80E-01 | 1953100  | 5167243030    | 0.00029 | 16-8911727      | 303289 | 9  |
| COVID19 positive hospitalized vs COVID19 negative or unknown | <i>POU5F1</i>     | M3 | <-1% | 0.363(0.057,2.295)   | 2.80E-01 | 1873100  | 5082352970    | 0.00029 | 6-31153649:G:A  | 10951  | 2  |
| COVID19 positive hospitalized vs COVID19 negative or unknown | <i>SIGLEC8</i>    | M1 | <-1% | 2.359(0.503,11.052)  | 2.80E-01 | 2017130  | 5253673980    | 0.00038 | 19-51739497     | 287119 | 20 |
| COVID19 positive hospitalized vs COVID19 negative or unknown | <i>ZNF432</i>     | M1 | <-1% | 1.745(0.629,4.839)   | 2.80E-01 | 2078710  | 53554414210   | 0.00133 | 19-51739497     | 294222 | 21 |
| COVID19 positive hospitalized vs COVID19 negative or unknown | <i>ZNF432</i>     | M3 | <-1% | 1.745(0.629,4.839)   | 2.80E-01 | 2078710  | 53554414210   | 0.00133 | 19-51739497     | 294222 | 21 |
| COVID19 positive hospitalized vs COVID19 negative or unknown | <i>DNX30A</i>     | M3 | <-1% | 1.265(0.809,1.979)   | 3.00E-01 | 2061240  | 53010348557   | 0.00456 | 21-33252612:A:G | 325694 | 11 |
| COVID19 positive hospitalized vs COVID19 negative or unknown | <i>SURF2</i>      | M1 | <-1% | 0.532(0.161,1.757)   | 3.00E-01 | 2084110  | 5343116540    | 0.00061 | 9-133270015:A:C | 86577  | 7  |
| COVID19 positive hospitalized vs COVID19 negative or unknown | <i>SURF4</i>      | M1 | <-1% | 5.574(0.219,142.075) | 3.00E-01 | 1937110  | 517635961     | 0.0001  | 9-133270015:A:C | 93448  | 8  |
| COVID19 positive hospitalized vs COVID19 negative or unknown | <i>IGLON5</i>     | M3 | <-1% | 1.781(0.591,5.367)   | 3.10E-01 | 2080510  | 5341278380    | 0.00078 | 19-51739497     | 427650 | 32 |
| COVID19 positive hospitalized vs COVID19 negative or unknown | <i>SIGLEC8</i>    | M3 | <-1% | 2.209(0.485,10.070)  | 3.10E-01 | 2082310  | 5345534120    | 0.00039 | 19-51739497     | 287119 | 20 |
| COVID19 positive hospitalized vs COVID19 negative or unknown | <i>ADAMTSL2</i>   | M3 | <-1% | 0.674(0.308,1.477)   | 3.20E-01 | 2081410  | 53353814200   | 0.00134 | 9-133270015:A:C | 264725 | 19 |
| COVID19 positive hospitalized vs COVID19 negative or unknown | <i>ARRDC5</i>     | M1 | <-1% | 4.900(0.209,114.787) | 3.20E-01 | 1872110  | 5084061260    | 0.00012 | 19-4719431:G:A  | 171614 | 7  |
| COVID19 positive hospitalized vs COVID19 negative or unknown | <i>GFI1B</i>      | M3 | <-1% | 0.761(0.444,1.304)   | 3.20E-01 | 2075100  | 5112532382    | 0.00303 | 9-133270015:A:C | 283337 | 20 |
| COVID19 positive hospitalized vs COVID19 negative or unknown | <i>LIM2</i>       | M3 | <-1% | 1.580(0.643,3.881)   | 3.20E-01 | 2078710  | 53377511900   | 0.00111 | 19-51739497     | 359297 | 25 |
| COVID19 positive hospitalized vs COVID19 negative or unknown | <i>OBP2B</i>      | M1 | <-1% | 1.214(0.828,1.778)   | 3.20E-01 | 2053320  | 52819467710   | 0.00633 | 9-133270015:A:C | 64687  | 3  |
| COVID19 positive hospitalized vs COVID19 negative or unknown | <i>OBP2B</i>      | M3 | <-1% | 1.214(0.828,1.778)   | 3.20E-01 | 2053320  | 52819467710   | 0.00633 | 9-133270015:A:C | 64687  | 3  |
| COVID19 positive hospitalized vs COVID19 negative or unknown | <i>PBRCA2</i>     | M1 | <-1% | 0.635(0.262,1.553)   | 3.20E-01 | 1870310  | 50556129710   | 0.00291 | 6-31153649:G:A  | 469140 | 34 |
| COVID19 positive hospitalized vs COVID19 negative or unknown | <i>CDT1</i>       | M1 | <-1% | 2.121(0.474,9.487)   | 3.30E-01 | 2015130  | 5257924350    | 0.00041 | 16-8911727      | 313896 | 11 |
| COVID19 positive hospitalized vs COVID19 negative or unknown | <i>RPL7A</i>      | M3 | <-1% | 0.364(0.048,2.778)   | 3.30E-01 | 1953100  | 5168042230    | 0.00021 | 9-133270015:A:C | 78228  | 5  |
| COVID19 positive hospitalized vs COVID19 negative or unknown | <i>TCF19</i>      | M1 | <-1% | 0.369(0.050,2.706)   | 3.30E-01 | 1938100  | 5174372941    | 0.00028 | 6-31153649:G:A  | 5820   | 1  |
| COVID19 positive hospitalized vs COVID19 negative or unknown | <i>XCR1</i>       | M3 | <-1% | 1.753(0.566,5.428)   | 3.30E-01 | 2081410  | 5342906750    | 0.00063 | 3-45859597:C:T  | 161348 | 6  |
| COVID19 positive hospitalized vs COVID19 negative or unknown | <i>CDSN</i>       | M3 | <-1% | 0.680(0.310,1.494)   | 3.40E-01 | 2074110  | 53140135631   | 0.00333 | 6-31153649:G:A  | 37625  | 3  |
| COVID19 positive hospitalized vs COVID19 negative or unknown | <i>CEL</i>        | M1 | <-1% | 0.802(0.513,1.256)   | 3.40E-01 | 2070150  | 530001494420  | 0.00465 | 9-133270015:A:C | 208022 | 16 |
| COVID19 positive hospitalized vs COVID19 negative or unknown | <i>CCR9</i>       | M1 | <-1% | 0.354(0.041,3.080)   | 3.50E-01 | 1938100  | 5175451870    | 0.00018 | 3-45859597:C:T  | 35336  | 2  |
| COVID19 positive hospitalized vs COVID19 negative or unknown | <i>CTU2</i>       | M3 | <-1% | 1.180(0.834,1.670)   | 3.50E-01 | 2047380  | 52641585446   | 0.008   | 16-8911727      | 411197 | 14 |
| COVID19 positive hospitalized vs COVID19 negative or unknown | <i>SPIC19</i>     | M3 | <-1% | 0.689(0.317,1.498)   | 3.50E-01 | 2081410  | 53329516682   | 0.00156 | 9-133270015:A:C | 386068 | 24 |
| COVID19 positive hospitalized vs COVID19 negative or unknown | <i>CEL</i>        | M3 | <-1% | 0.832(0.564,1.229)   | 3.60E-01 | 2064210  | 528589635521  | 0.00598 | 9-133270015:A:C | 208022 | 16 |
| COVID19 positive hospitalized vs COVID19 negative or unknown | <i>CRYZL1</i>     | M1 | <-1% | 0.363(0.042,3.132)   | 3.60E-01 | 1938100  | 5175202120    | 0.0002  | 21-33252612:A:G | 337178 | 12 |
| COVID19 positive hospitalized vs COVID19 negative or unknown | <i>FAM163B</i>    | M3 | <-1% | 1.436(0.647,3.191)   | 3.70E-01 | 2066190  | 53039645690   | 0.00427 | 9-133270015:A:C | 309006 | 21 |
| COVID19 positive hospitalized vs COVID19 negative or unknown | <i>MPND</i>       | M1 | <-1% | 0.376(0.044,3.228)   | 3.70E-01 | 2020010  | 5255402241    | 0.00021 | 19-4719431:G:A  | 375838 | 18 |
| COVID19 positive hospitalized vs COVID19 negative or unknown | <i>C21orf62</i>   | M1 | <-1% | 0.362(0.038,3.417)   | 3.80E-01 | 1938100  | 5175671650    | 0.00016 | 21-33252612:A:G | 458851 | 13 |
| COVID19 positive hospitalized vs COVID19 negative or unknown | <i>C21orf62</i>   | M3 | <-1% | 0.362(0.038,3.417)   | 3.80E-01 | 1938100  | 5175671650    | 0.00016 | 21-33252612:A:G | 458851 | 13 |
| COVID19 positive hospitalized vs COVID19 negative or unknown | <i>PIEZO1</i>     | M1 | <-1% | 0.722(0.350,1.488)   | 3.80E-01 | 2080510  | 53324317220   | 0.00161 | 16-8911727      | 402123 | 13 |
| COVID19 positive hospitalized vs COVID19 negative or unknown | <i>ACSF3</i>      | M3 | <-1% | 0.874(0.642,1.189)   | 3.90E-01 | 2048370  | 5242131073517 | 0.01006 | 16-8911727      | 17046  | 1  |
| COVID19 positive hospitalized vs COVID19 negative or unknown | <i>HMMR</i>       | M1 | <-1% | 0.722(0.342,1.522)   | 3.90E-01 | 2080510  | 53329917215   | 0.00162 | 5-163300447     | 160245 | 3  |
| COVID19 positive hospitalized vs COVID19 negative or unknown | <i>SHD</i>        | M3 | <-1% | 1.511(0.585,3.902)   | 3.90E-01 | 2083210  | 53391810452   | 0.00098 | 19-4719431:G:A  | 439368 | 22 |
| COVID19 positive hospitalized vs COVID19 negative or unknown | <i>TICAM1</i>     | M1 | <-1% | 3.730(0.189,73.610)  | 3.90E-01 | 1872110  | 5083881640    | 0.00016 | 19-4719431:G:A  | 96807  | 8  |
| COVID19 positive hospitalized vs COVID19 negative or unknown | <i>TICAM1</i>     | M3 | <-1% | 3.657(0.188,71.218)  | 3.90E-01 | 1872110  | 5083651670    | 0.00016 | 19-4719431:G:A  | 96807  | 8  |
| COVID19 positive hospitalized vs COVID19 negative or unknown | <i>SURF1</i>      | M3 | <-1% | 1.308(0.702,2.439)   | 4.00E-01 | 2072130  | 53262723380   | 0.00219 | 9-133270015:A:C | 81897  | 5  |
| COVID19 positive hospitalized vs COVID19 negative or unknown | <i>CXCR6</i>      | M1 | <-1% | 0.364(0.034,3.941)   | 4.10E-01 | 1940010  | 5170721980    | 0.00019 | 3-45859597:C:T  | 86884  | 4  |
| COVID19 positive hospitalized vs COVID19 negative or unknown | <i>DDX39B</i>     | M3 | <-1% | 0.367(0.034,3.973)   | 4.10E-01 | 1873100  | 5082652670    | 0.00026 | 6-31153649:G:A  | 376784 | 20 |
| COVID19 positive hospitalized vs COVID19 negative or unknown | <i>IL17C</i>      | M3 | <-1% | 1.666(0.496,5.595)   | 4.10E-01 | 2081410  | 5342617040    | 0.00066 | 16-8911727      | 479086 | 21 |
| COVID19 positive hospitalized vs COVID19 negative or unknown | <i>UBXN6</i>      | M1 | <-1% | 0.368(0.034,3.984)   | 4.10E-01 | 2020010  | 5255831820    | 0.00017 | 19-4719431:G:A  | 273934 | 14 |
| COVID19 positive hospitalized vs COVID19 negative or unknown | <i>PPF1R18</i>    | M1 | <-1% | 0.365(0.031,4.278)   | 4.20E-01 | 1873100  | 5083561760    | 0.00017 | 6-31153649:G:A  | 476381 | 35 |
| COVID19 positive hospitalized vs COVID19 negative or unknown | <i>ZNF614</i>     | M1 | <-1% | 2.130(0.339,13.393)  | 4.20E-01 | 2083210  | 5347092560    | 0.00024 | 19-51739497     | 273639 | 19 |
| COVID19 positive hospitalized vs COVID19 negative or unknown | <i>ZNF614</i>     | M3 | <-1% | 2.130(0.339,13.393)  | 4.20E-01 | 2083210  | 5347092560    | 0.00024 | 19-51739497     | 273639 | 19 |
| COVID19 positive hospitalized vs COVID19 negative or unknown | <i>ETFB</i>       | M3 | <-1% | 1.329(0.655,2.696)   | 4.30E-01 | 2077810  | 53321317511   | 0.00164 | 19-51739497     | 394287 | 29 |
| COVID19 positive hospitalized vs COVID19 negative or unknown | <i>ACSF3</i>      | M1 | <-1% | 0.683(0.258,1.808)   | 4.40E-01 | 2082310  | 5340938720    | 0.00081 | 16-8911727      | 17046  | 1  |
| COVID19 positive hospitalized vs COVID19 negative or unknown | <i>ANKRD11</i>    | M3 | <-1% | 1.168(0.788,1.733)   | 4.40E-01 | 2056290  | 5283966233    | 0.00062 | 16-8911727      | 150750 | 5  |
| COVID19 positive hospitalized vs COVID19 negative or unknown | <i>DNAJC28</i>    | M3 | <-1% | 0.762(0.384,1.512)   | 4.40E-01 | 2079610  | 53303119340   | 0.00181 | 21-33252612:A:G | 235614 | 8  |
| COVID19 positive hospitalized vs COVID19 negative or unknown | <i>FYCO1</i>      | M1 | <-1% | 1.425(0.575,3.534)   | 4.40E-01 | 2080510  | 53386510982   | 0.00103 | 3-45859597:C:T  | 62167  | 3  |
| COVID19 positive hospitalized vs COVID19 negative or unknown | <i>GALNS</i>      | M3 | <-1% | 0.747(0.357,1.563)   | 4.40E-01 | 2080510  | 53314118231   | 0.00017 | 16-8911727      | 303289 | 9  |
| COVID19 positive hospitalized vs COVID19 negative or unknown | <i>BNGR2</i>      | M3 | <-1% | 3.072(0.176,53.618)  | 4.40E-01 | 1872110  | 5084061260    | 0.00012 | 21-33252612:A:G | 150931 | 4  |
| COVID19 positive hospitalized vs COVID19 negative or unknown | <i>PLIN3</i>      | M3 | <-1% | 0.591(0.154,2.274)   | 4.40E-01 | 2084110  | 5345134511    | 0.00042 | 19-4719431:G:A  | 119760 | 6  |
| COVID19 positive hospitalized vs COVID19 negative or unknown | <i>PLIN3</i>      | M3 | <-1% | 1.205(0.756,1.912)   | 4.40E-01 | 2064210  | 530811413321  | 0.00391 | 19-4719431:G:A  | 214973 | 12 |
| COVID19 positive hospitalized vs COVID19 negative or unknown | <i>TRAF7L2</i>    | M3 | <-1% | 0.856(0.578,1.273)   | 4.40E-01 | 2064210  | 527447780414  | 0.00703 | 16-8911727      | 260577 | 8  |
| COVID19 positive hospitalized vs COVID19 negative or unknown | <i>ADAMTSL2</i>   | M1 | <-1% | 0.727(0.317,1.669)   | 4.50E-01 | 2081410  | 53374412147   | 0.00115 | 9-133270015:A:C | 264725 | 19 |
| COVID19 positive hospitalized vs COVID19 negative or unknown | <i>GART</i>       | M1 | <-1% | 1.393(0.591,3.285)   | 4.50E-01 | 2078710  | 53341715480   | 0.00145 | 21-33252612:A:G | 251511 | 9  |
| COVID19 positive hospitalized vs COVID19 negative or unknown | <i>IL10RB</i>     | M1 | <-1% | 2.965(0.174,50.555)  | 4.50E-01 | 1937110  | 5175841480    | 0.00014 | 21-33252612:A:G | 13853  | 2  |
| COVID19 positive hospitalized vs COVID19 negative or unknown | <i>SLC2A6</i>     | M1 | <-1% | 0.377(0.030,4.670)   | 4.50E-01 | 2085010  | 5348011631    | 0.00015 | 9-133270015:A:C | 202005 | 15 |
| COVID19 positive hospitalized vs COVID19 negative or unknown | <i>ZNF649</i>     | M1 | <-1% | 0.367(0.027,4.993)   | 4.50E-01 | 1873100  | 5083631690    | 0.00017 | 19-51739497     | 151120 | 11 |
| COVID19 positive hospitalized vs COVID19 negative or unknown | <i>ZNF649</i>     | M3 | <-1% | 0.367(0.027,4.993)   | 4.50E-01 | 1873100  | 5083631690    | 0.00017 | 19-51739497     | 151120 | 11 |
| COVID19 positive hospitalized vs COVID19 negative or unknown | <i>AIF1</i>       | M1 | <-1% | 0.364(0.025,5.368)   | 4.60E-01 | 1938100  | 5175871450    | 0.00014 | 6-31153649:G:A  | 461680 | 32 |
| COVID19 positive hospitalized vs COVID19 negative or unknown | <i>SEMA6B</i>     | M1 | <-1% | 0.359(0.023,5.521)   | 4.60E-01 | 1873100  | 5084071250    | 0.00012 | 19-4719431:G:A  | 176518 | 8  |
| COVID19 positive hospitalized vs COVID19 negative or unknown | <i>SEMA6B</i>     | M3 | <-1% | 0.359(0.023,5.521)   | 4.60E-01 | 1873100  | 5084071250    | 0.00012 | 19-4719431:G:A  | 176518 | 8  |
| COVID19 positive hospitalized vs COVID19 negative or unknown | <i>EBI3</i>       | M1 | <-1% | 0.366(0.031,5.744)   | 4.70E-01 | 1873100  | 5083811610    | 0.00014 | 19-4719431:G:A  | 489881 | 24 |
| COVID19 positive hospitalized vs COVID19 negative or unknown | <i>FLIT1</i>      | M1 | <-1% | 0.365(0.023,5.722)   | 4.70E-01 | 1873100  | 5083971350    | 0.00013 | 6-31153649:G:A  | 425534 | 26 |
| COVID19 positive hospitalized vs COVID19 negative or unknown | <i>MED22</i>      | M3 | <-1% | 0.600(0.150,4.401)   | 4.70E-01 | 2084110  | 5344844810    | 0.00045 | 9-133270015:A:C | 71489  | 4  |
| COVID19 positive hospitalized vs COVID19 negative or unknown | <i>NKG7</i>       | M3 | <-1% | 1.921(0.             |          |          |               |         |                 |        |    |

|                                                              |             |    |     |                     |            |           |                |         |                 |        |    |
|--------------------------------------------------------------|-------------|----|-----|---------------------|------------|-----------|----------------|---------|-----------------|--------|----|
| COVID19 positive hospitalized vs COVID19 negative or unknown | LTB         | M3 | <1% | 0.359/0.018; 7.128  | 5.00E-01   | 1873/00   | 50844587/0     | 0.00009 | 6:31153649;G:A  | 427059 | 27 |
| COVID19 positive hospitalized vs COVID19 negative or unknown | NUDCD2      | M3 | <1% | 0.607/0.142; 2.598  | 5.00E-01   | 2084/10   | 534582383/0    | 0.00036 | 5:163300447     | 153519 | 2  |
| COVID19 positive hospitalized vs COVID19 negative or unknown | SURF4       | M3 | <1% | 0.612/0.149; 2.513  | 5.00E-01   | 2084/10   | 534492742/1    | 0.00044 | 9:133270015;A:C | 93448  | 8  |
| COVID19 positive hospitalized vs COVID19 negative or unknown | C6orf13     | M1 | <1% | 0.370/0.019; 7.362  | 5.10E-01   | 1873/00   | 508407124/1    | 0.00012 | 6:31153649;G:A  | 42269  | 7  |
| COVID19 positive hospitalized vs COVID19 negative or unknown | CDT1        | M3 | <1% | 0.840/0.506; 1.412  | 5.10E-01   | 2073/20   | 5320382920/7   | 0.00274 | 16:8911727      | 313896 | 11 |
| COVID19 positive hospitalized vs COVID19 negative or unknown | FPR3        | M3 | <1% | 0.363/0.017; 12.326 | 5.10E-01   | 1873/00   | 51694780/0     | 0.00008 | 19:51739497     | 29161  | 3  |
| COVID19 positive hospitalized vs COVID19 negative or unknown | FPR2        | M3 | <1% | 0.365/0.019; 7.103  | 5.10E-01   | 1953/00   | 51694780/0     | 0.00008 | 19:51739497     | 29161  | 3  |
| COVID19 positive hospitalized vs COVID19 negative or unknown | MPND        | M3 | <1% | 1.146/0.765; 1.717  | 5.10E-01   | 2059/251  | 5287726178/15  | 0.0058  | 19:4719431;G:A  | 375838 | 18 |
| COVID19 positive hospitalized vs COVID19 negative or unknown | GTF3C5      | M3 | <1% | 1.236/0.644; 2.372  | 5.20E-01   | 2074/110  | 5354962469/0   | 0.00231 | 9:133270015;A:C | 239004 | 17 |
| COVID19 positive hospitalized vs COVID19 negative or unknown | MVD         | M3 | <1% | 0.778/0.361; 1.676  | 5.20E-01   | 2080/50   | 533271687/1    | 0.00158 | 16:8911727      | 465203 | 19 |
| COVID19 positive hospitalized vs COVID19 negative or unknown | CBFA2T3     | M1 | <1% | 2.336/0.164; 33.240 | 5.30E-01   | 1872/10   | 508348183/1    | 0.00018 | 16:8911727      | 240752 | 6  |
| COVID19 positive hospitalized vs COVID19 negative or unknown | CCNG1       | M1 | <1% | 0.370/0.017; 7.948  | 5.30E-01   | 2020/00   | 525664101/0    | 0.0001  | 5:163300447     | 138809 | 1  |
| COVID19 positive hospitalized vs COVID19 negative or unknown | IL17C       | M1 | <1% | 0.364/0.016; 8.237  | 5.30E-01   | 1873/00   | 508415117/0    | 0.00011 | 16:8911727      | 479086 | 21 |
| COVID19 positive hospitalized vs COVID19 negative or unknown | AC018753.18 | M3 | <1% | 1.134/0.757; 1.697  | 5.40E-01   | 2058/270  | 5288706077/18  | 0.00572 | 19:51739497     | 127267 | 7  |
| COVID19 positive hospitalized vs COVID19 negative or unknown | HIST1       | M3 | <1% | 1.169/0.709; 1.925  | 5.40E-01   | 2067/180  | 5308044459/2   | 0.00389 | 19:51739497     | 26071  | 2  |
| COVID19 positive hospitalized vs COVID19 negative or unknown | PLIN3       | M1 | <1% | 0.640/0.151; 2.712  | 5.40E-01   | 2084/10   | 534575389/1    | 0.00036 | 19:4719431;G:A  | 119760 | 6  |
| COVID19 positive hospitalized vs COVID19 negative or unknown | APRT        | M1 | <1% | 0.637/0.147; 2.755  | 5.50E-01   | 1939/10   | 516800470/0    | 0.00045 | 16:8911727      | 308030 | 10 |
| COVID19 positive hospitalized vs COVID19 negative or unknown | FPR3        | M3 | <1% | 0.379/0.016; 9.247  | 5.50E-01   | 1940/00   | 51720169/0     | 0.00007 | 19:51739497     | 84251  | 5  |
| COVID19 positive hospitalized vs COVID19 negative or unknown | ZNF577      | M1 | <1% | 0.710/0.232; 2.175  | 5.50E-01   | 2083/20   | 534235729/1    | 0.00068 | 19:51739497     | 133034 | 10 |
| COVID19 positive hospitalized vs COVID19 negative or unknown | ZNF577      | M3 | <1% | 0.710/0.232; 2.175  | 5.50E-01   | 2083/20   | 534235729/1    | 0.00068 | 19:51739497     | 133034 | 10 |
| COVID19 positive hospitalized vs COVID19 negative or unknown | CCR3        | M3 | <1% | 0.839/0.467; 1.509  | 5.60E-01   | 2076/90   | 5327052252/8   | 0.00212 | 3:45859597;C:T  | 404806 | 10 |
| COVID19 positive hospitalized vs COVID19 negative or unknown | REXO4       | M1 | <1% | 1.410/0.440; 4.521  | 5.60E-01   | 2081/40   | 534520442/3    | 0.00042 | 9:133270015;A:C | 136937 | 11 |
| COVID19 positive hospitalized vs COVID19 negative or unknown | ABO         | M1 | <1% | 1.163/0.694; 1.949  | 5.70E-01   | 2068/170  | 5312053752/8   | 0.00352 | 9:133270015;A:C | 14414  | 1  |
| COVID19 positive hospitalized vs COVID19 negative or unknown | ABO         | M3 | <1% | 1.163/0.694; 1.949  | 5.70E-01   | 2068/170  | 5312053752/8   | 0.00352 | 9:133270015;A:C | 14414  | 1  |
| COVID19 positive hospitalized vs COVID19 negative or unknown | CR2L1       | M3 | <1% | 0.755/0.288; 1.982  | 5.70E-01   | 2082/30   | 5339231044/11  | 0.00097 | 21:33252612;A:G | 337178 | 12 |
| COVID19 positive hospitalized vs COVID19 negative or unknown | DPP9        | M1 | <1% | 0.364/0.011; 12.326 | 5.70E-01   | 1938/00   | 517629103/0    | 0.0001  | 19:4719431;G:A  | 42868  | 1  |
| COVID19 positive hospitalized vs COVID19 negative or unknown | GTE2H4      | M1 | <1% | 0.648/0.147; 2.863  | 5.70E-01   | 1872/10   | 508061471/0    | 0.00046 | 6:31153649;G:A  | 244613 | 15 |
| COVID19 positive hospitalized vs COVID19 negative or unknown | GTE2H4      | M3 | <1% | 0.648/0.147; 2.863  | 5.70E-01   | 1872/10   | 508061471/0    | 0.00046 | 6:31153649;G:A  | 244613 | 15 |
| COVID19 positive hospitalized vs COVID19 negative or unknown | NFKB1L1     | M1 | <1% | 0.362/0.010; 12.546 | 5.70E-01   | 1938/00   | 517626106/0    | 0.0001  | 6:31153649;G:A  | 394045 | 22 |
| COVID19 positive hospitalized vs COVID19 negative or unknown | STAP2       | M1 | <1% | 0.647/0.146; 2.879  | 5.70E-01   | 2084/10   | 534556408/1    | 0.00038 | 19:4719431;G:A  | 395299 | 19 |
| COVID19 positive hospitalized vs COVID19 negative or unknown | STAP2       | M3 | <1% | 0.647/0.146; 2.879  | 5.70E-01   | 2084/10   | 534556408/1    | 0.00038 | 19:4719431;G:A  | 395299 | 19 |
| COVID19 positive hospitalized vs COVID19 negative or unknown | AC018753.18 | M1 | <1% | 1.121/0.745; 1.688  | 5.80E-01   | 2059/260  | 529095858/18   | 0.00551 | 19:51739497     | 127267 | 7  |
| COVID19 positive hospitalized vs COVID19 negative or unknown | DDRI        | M3 | <1% | 0.897/0.612; 1.314  | 5.80E-01   | 2061/240  | 5281776786/2   | 0.00634 | 6:31153649;G:A  | 268430 | 17 |
| COVID19 positive hospitalized vs COVID19 negative or unknown | GTF3C3      | M1 | <1% | 1.613/0.302; 8.614  | 5.80E-01   | 2018/20   | 525364401/0    | 0.00038 | 9:133270015;A:C | 239004 | 17 |
| COVID19 positive hospitalized vs COVID19 negative or unknown | IER3        | M3 | <1% | 0.366/0.011; 12.404 | 5.80E-01   | 1873/00   | 51778929/0     | 0.00009 | 6:31153649;G:A  | 409714 | 23 |
| COVID19 positive hospitalized vs COVID19 negative or unknown | RPL13       | M1 | <1% | 0.386/0.014; 11.051 | 5.80E-01   | 2020/00   | 52571055/0     | 0.00005 | 16:8911727      | 443332 | 17 |
| COVID19 positive hospitalized vs COVID19 negative or unknown | RPL13       | M3 | <1% | 0.386/0.014; 11.051 | 5.80E-01   | 2020/00   | 52571055/0     | 0.00005 | 16:8911727      | 443332 | 17 |
| COVID19 positive hospitalized vs COVID19 negative or unknown | CXCR6       | M3 | <1% | 1.374/0.439; 4.303  | 5.90E-01   | 2082/30   | 5339611004/0   | 0.00094 | 3:45859597;C:T  | 86884  | 4  |
| COVID19 positive hospitalized vs COVID19 negative or unknown | DDX39B      | M1 | <1% | 0.369/0.010; 13.799 | 5.90E-01   | 1873/00   | 508388144/0    | 0.00014 | 6:31153649;G:A  | 376784 | 20 |
| COVID19 positive hospitalized vs COVID19 negative or unknown | EBI3        | M3 | <1% | 0.659/0.147; 2.957  | 5.90E-01   | 2084/10   | 53457387/1     | 0.00036 | 19:4719431;G:A  | 489881 | 24 |
| COVID19 positive hospitalized vs COVID19 negative or unknown | HLA-C       | M1 | <1% | 0.819/0.399; 1.682  | 5.90E-01   | 1932/60   | 5158691859/4   | 0.0018  | 6:31153649;G:A  | 115519 | 8  |
| COVID19 positive hospitalized vs COVID19 negative or unknown | HLA-C       | M3 | <1% | 0.819/0.399; 1.682  | 5.90E-01   | 1932/60   | 5158691859/4   | 0.0018  | 6:31153649;G:A  | 115519 | 8  |
| COVID19 positive hospitalized vs COVID19 negative or unknown | SNAI3       | M1 | <1% | 2.035/0.154; 26.820 | 5.90E-01   | 1937/10   | 517625104/3    | 0.00011 | 16:8911727      | 439280 | 16 |
| COVID19 positive hospitalized vs COVID19 negative or unknown | CYBA        | M1 | <1% | 0.365/0.009; 15.232 | 6.00E-01   | 1873/00   | 50843995/0     | 0.00009 | 16:8911727      | 474375 | 20 |
| COVID19 positive hospitalized vs COVID19 negative or unknown | LTA         | M3 | <1% | 0.370/0.009; 15.194 | 6.00E-01   | 1873/00   | 50845082/0     | 0.00008 | 6:31153649;G:A  | 419093 | 24 |
| COVID19 positive hospitalized vs COVID19 negative or unknown | SLGLEC10    | M1 | <1% | 1.257/0.533; 2.964  | 6.00E-01   | 2080/50   | 5326912274/0   | 0.00212 | 19:51739497     | 328399 | 23 |
| COVID19 positive hospitalized vs COVID19 negative or unknown | ETFB        | M1 | <1% | 0.382/0.010; 15.023 | 6.10E-01   | 2018/00   | 526137900/0    | 0.00009 | 19:51739497     | 394287 | 29 |
| COVID19 positive hospitalized vs COVID19 negative or unknown | IER3        | M1 | <1% | 0.365/0.008; 17.529 | 6.10E-01   | 1873/00   | 508462700/0    | 0.00007 | 6:31153649;G:A  | 409714 | 23 |
| COVID19 positive hospitalized vs COVID19 negative or unknown | MAT2B       | M1 | <1% | 0.365/0.008; 17.788 | 6.10E-01   | 1873/00   | 50846369/0     | 0.00007 | 5:163300447     | 202947 | 4  |
| COVID19 positive hospitalized vs COVID19 negative or unknown | RPL7A       | M1 | <1% | 0.364/0.007; 18.601 | 6.10E-01   | 1873/00   | 50846468/0     | 0.00007 | 9:133270015;A:C | 78228  | 5  |
| COVID19 positive hospitalized vs COVID19 negative or unknown | TMEM50B     | M3 | <1% | 1.489/0.318; 6.964  | 6.10E-01   | 2004/10   | 526117353/0    | 0.00033 | 21:33252612;A:G | 198205 | 6  |
| COVID19 positive hospitalized vs COVID19 negative or unknown | CCR9        | M3 | <1% | 0.845/0.435; 1.640  | 6.20E-01   | 2075/100  | 5317493216/0   | 0.003   | 3:45859597;C:T  | 35336  | 2  |
| COVID19 positive hospitalized vs COVID19 negative or unknown | PIEZO1      | M3 | <1% | 0.954/0.793; 1.149  | 6.20E-01   | 1973/1111 | 50460930275/81 | 0.02844 | 16:8911727      | 402123 | 13 |
| COVID19 positive hospitalized vs COVID19 negative or unknown | SLGLEC11    | M1 | <1% | 1.211/0.569; 2.576  | 6.20E-01   | 2010/80   | 524491772/6    | 0.0017  | 19:51739497     | 475425 | 34 |
| COVID19 positive hospitalized vs COVID19 negative or unknown | TMEM8C      | M1 | <1% | 0.366/0.007; 19.640 | 6.20E-01   | 1873/00   | 50845973/0     | 0.00007 | 9:133270015;A:C | 244620 | 18 |
| COVID19 positive hospitalized vs COVID19 negative or unknown | AVKRD11     | M1 | <1% | 0.370/0.006; 21.174 | 6.30E-01   | 1873/00   | 508426106/0    | 0.0001  | 16:8911727      | 150750 | 5  |
| COVID19 positive hospitalized vs COVID19 negative or unknown | HLA-B       | M1 | <1% | 0.370/0.006; 21.195 | 6.30E-01   | 1873/00   | 50845082/0     | 0.00008 | 6:31153649;G:A  | 200833 | 11 |
| COVID19 positive hospitalized vs COVID19 negative or unknown | HLA-B       | M3 | <1% | 0.370/0.006; 21.195 | 6.30E-01   | 1873/00   | 50845082/0     | 0.00008 | 6:31153649;G:A  | 200833 | 11 |
| COVID19 positive hospitalized vs COVID19 negative or unknown | LTB         | M1 | <1% | 0.364/0.006; 22.319 | 6.30E-01   | 1873/00   | 50847557/0     | 0.00006 | 6:31153649;G:A  | 427059 | 27 |
| COVID19 positive hospitalized vs COVID19 negative or unknown | SLGLEC11    | M3 | <1% | 1.204/0.567; 2.557  | 6.30E-01   | 2077/80   | 5331801779/6   | 0.00167 | 19:51739497     | 475425 | 34 |
| COVID19 positive hospitalized vs COVID19 negative or unknown | IFNAR1      | M3 | <1% | 0.756/0.234; 2.444  | 6.40E-01   | 2083/20   | 534219746/0    | 0.0007  | 21:33252612;A:G | 72443  | 3  |
| COVID19 positive hospitalized vs COVID19 negative or unknown | NRM         | M1 | <1% | 1.796/0.152; 21.204 | 6.40E-01   | 1952/10   | 516825202/0    | 0.0002  | 6:31153649;G:A  | 464989 | 33 |
| COVID19 positive hospitalized vs COVID19 negative or unknown | GFIIB       | M1 | <1% | 0.367/0.004; 30.523 | 6.60E-01   | 1873/00   | 50846666/0     | 0.00006 | 9:133270015;A:C | 283337 | 20 |
| COVID19 positive hospitalized vs COVID19 negative or unknown | PLIN4       | M1 | <1% | 1.140/0.639; 2.037  | 6.60E-01   | 2072/130  | 5320072949/9   | 0.00277 | 19:4719431;G:A  | 214973 | 12 |
| COVID19 positive hospitalized vs COVID19 negative or unknown | SDN         | M1 | <1% | 0.364/0.004; 34.635 | 6.60E-01   | 1940/00   | 51720763/0     | 0.00006 | 21:33252612;A:G | 390480 | 10 |
| COVID19 positive hospitalized vs COVID19 negative or unknown | HIST1       | M1 | <1% | 1.189/0.533; 2.654  | 6.70E-01   | 2078/70   | 5332191745/1   | 0.00163 | 19:51739497     | 26071  | 2  |
| COVID19 positive hospitalized vs COVID19 negative or unknown | LRG1        | M3 | <1% | 1.270/0.427; 3.778  | 6.70E-01   | 2083/20   | 534605360/0    | 0.00034 | 19:4719431;G:A  | 181492 | 9  |
| COVID19 positive hospitalized vs COVID19 negative or unknown | SIGLEC6     | M1 | <1% | 0.708/0.143; 3.510  | 6.70E-01   | 1872/10   | 507687845/0    | 0.00083 | 19:51739497     | 219416 | 14 |
| COVID19 positive hospitalized vs COVID19 negative or unknown | SIGLEC6     | M3 | <1% | 0.708/0.143; 3.510  | 6.70E-01   | 1872/10   | 507687845/0    | 0.00083 | 19:51739497     | 219416 | 14 |
| COVID19 positive hospitalized vs COVID19 negative or unknown | TNF         | M3 | <1% | 1.319/0.364; 4.770  | 6.70E-01   | 1950/30   | 516388639/0    | 0.00062 | 6:31153649;G:A  | 422092 | 25 |
| COVID19 positive hospitalized vs COVID19 negative or unknown | LST1        | M1 | <1% | 0.366/0.003; 43.447 | 6.80E-01   | 1873/00   | 50848349/0     | 0.00005 | 6:31153649;G:A  | 433650 | 29 |
| COVID19 positive hospitalized vs COVID19 negative or unknown | LST1        | M3 | <1% | 0.366/0.003; 43.447 | 6.80E-01   | 1873/00   | 50848349/0     | 0.00005 | 6:31153649;G:A  | 433650 | 29 |
| COVID19 positive hospitalized vs COVID19 negative or unknown | MC1D1       | M1 | <1% | 1.676/0.149; 18.821 | 6.80E-01   | 1872/10   | 508364168/0    | 0.00017 | 6:31153649;G:A  | 375365 | 19 |
| COVID19 positive hospitalized vs COVID19 negative or unknown | MC1D1       | M3 | <1% | 1.676/0.149; 18.821 | 6.80E-01   | 1872/10   | 508364168/0    | 0.00017 | 6:31153649;G:A  | 375365 | 19 |
| COVID19 positive hospitalized vs COVID19 negative or unknown | TNFAIP3L1   | M1 | <1% | 0.367/0.003; 43.093 | 6.80E-01   | 1873/00   | 50848547/0     | 0.00005 | 19:4719431;G:A  | 67562  | 3  |
| COVID19 positive hospitalized vs COVID19 negative or unknown | CCR1        | M1 | <1% | 0.364/0.003; 36.469 | 6.90E-01   | 1940/00   | 50848349/0     | 0.00003 | 3:45859597;C:T  | 34368  | 9  |
| COVID19 positive hospitalized vs COVID19 negative or unknown | LMZ         | M1 | <1% | 0.370/0.003; 49.414 | 6.90E-01   | 1940/00   | 51721159/0     | 0.00006 | 19:51739497     | 359297 | 25 |
| COVID19 positive hospitalized vs COVID19 negative or unknown | ZNF613      | M3 | <1% | 1.380/0.280; 6.797  | 6.90E-01   | 2083/20   | 534542423/0    | 0.0004  | 19:51739497     | 196723 | 13 |
| COVID19 positive hospitalized vs COVID19 negative or unknown | MCA4        | M1 | <1% | 1.113/0.628; 1.974  | 7.10E-01   | 2072/130  | 5317573199/9   | 0.00301 | 6:31153649;G:A  | 249983 | 16 |
| COVID19 positive hospitalized vs COVID19 negative or unknown | MCA4        | M3 | <1% | 1.113/0.628; 1.974  | 7.10E-01</ |           |                |         |                 |        |    |

|                                                              |                  |    |     |                          |          |           |                 |         |                 |        |    |
|--------------------------------------------------------------|------------------|----|-----|--------------------------|----------|-----------|-----------------|---------|-----------------|--------|----|
| COVID19 positive hospitalized vs COVID19 negative or unknown | <i>FSD1</i>      | M1 | <1% | 0.3690 0.001 117.744     | 7.30E-01 | 1873 00   | 50849438 0      | 0.00004 | 19:4719431:G:A  | 414685 | 20 |
| COVID19 positive hospitalized vs COVID19 negative or unknown | <i>GBGT1</i>     | M3 | <1% | 1.0490 0.804 1.368       | 7.30E-01 | 202757 1  | 521986 12948 31 | 0.01217 | 9:133270015:A:C | 116439 | 10 |
| COVID19 positive hospitalized vs COVID19 negative or unknown | <i>SGLEC12</i>   | M1 | <1% | 1.182 0.460 3.036        | 7.30E-01 | 2080 50   | 53398 1982 2    | 0.00092 | 19:51739497     | 247857 | 16 |
| COVID19 positive hospitalized vs COVID19 negative or unknown | <i>SGLEC12</i>   | M3 | <1% | 1.1790 0.459 3.029       | 7.30E-01 | 2080 50   | 53398 0983 2    | 0.00092 | 19:51739497     | 247857 | 16 |
| COVID19 positive hospitalized vs COVID19 negative or unknown | <i>CDH15</i>     | M1 | <1% | 1.3040 0.277 6.149       | 7.40E-01 | 2083 20   | 53454 431 0     | 0.00004 | 16:89117727     | 54104  | 2  |
| COVID19 positive hospitalized vs COVID19 negative or unknown | <i>POU3F1</i>    | M1 | <1% | 0.3570 0.001 66.756      | 7.40E-01 | 1873 00   | 50850775 0      | 0.00002 | 6:31153649:G:A  | 10051  | 2  |
| COVID19 positive hospitalized vs COVID19 negative or unknown | <i>FAM163B</i>   | M1 | <1% | 0.3690 0.001 63.914      | 7.50E-01 | 1873 00   | 508499 33 0     | 0.00003 | 9:133270015:A:C | 309006 | 21 |
| COVID19 positive hospitalized vs COVID19 negative or unknown | <i>STKLD1</i>    | M1 | <1% | 1.1660 0.455 2.987       | 7.50E-01 | 2080 50   | 533984980 1     | 0.00092 | 9:133270015:A:C | 106458 | 9  |
| COVID19 positive hospitalized vs COVID19 negative or unknown | <i>TMEM50B</i>   | M1 | <1% | 0.3680 0.001 185.287     | 7.50E-01 | 1873 00   | 50849438 0      | 0.00004 | 21:33252612:A:G | 198205 | 6  |
| COVID19 positive hospitalized vs COVID19 negative or unknown | <i>ZNF350</i>    | M1 | <1% | 0.7610 0.144 4.027       | 7.50E-01 | 2084 10   | 534690274 1     | 0.00026 | 19:51739497     | 225356 | 15 |
| COVID19 positive hospitalized vs COVID19 negative or unknown | <i>ZNF350</i>    | M3 | <1% | 0.7610 0.144 4.027       | 7.50E-01 | 2084 10   | 534690274 1     | 0.00026 | 19:51739497     | 225356 | 15 |
| COVID19 positive hospitalized vs COVID19 negative or unknown | <i>CCDC94</i>    | M3 | <1% | 1.2030 0.364 3.973       | 7.60E-01 | 2083 20   | 534347617 1     | 0.00058 | 19:4719431:G:A  | 472285 | 23 |
| COVID19 positive hospitalized vs COVID19 negative or unknown | <i>DPCR1</i>     | M1 | <1% | 0.8230 0.237 2.860       | 7.60E-01 | 2083 20   | 534233 73 11    | 0.00068 | 6:31153649:G:A  | 219027 | 12 |
| COVID19 positive hospitalized vs COVID19 negative or unknown | <i>DPCR1</i>     | M3 | <1% | 0.8230 0.237 2.860       | 7.60E-01 | 2083 20   | 534233 73 11    | 0.00068 | 6:31153649:G:A  | 219027 | 12 |
| COVID19 positive hospitalized vs COVID19 negative or unknown | <i>DPP9</i>      | M3 | <1% | 1.0640 0.709 1.598       | 7.60E-01 | 2060 25 0 | 528522630 13    | 0.00603 | 19:4719431:G:A  | 42868  | 1  |
| COVID19 positive hospitalized vs COVID19 negative or unknown | <i>PPR3</i>      | M1 | <1% | 0.3690 0.001 218.142     | 7.60E-01 | 1873 00   | 50851022 0      | 0.00002 | 19:51739497     | 84251  | 5  |
| COVID19 positive hospitalized vs COVID19 negative or unknown | <i>PSORS1C1</i>  | M1 | <1% | 0.8980 0.453 1.780       | 7.60E-01 | 2079 60   | 533000 1964 1   | 0.00184 | 6:31153649:G:A  | 24017  | 5  |
| COVID19 positive hospitalized vs COVID19 negative or unknown | <i>PSORS1C1</i>  | M3 | <1% | 0.8980 0.453 1.780       | 7.60E-01 | 2079 60   | 533000 1964 1   | 0.00184 | 6:31153649:G:A  | 24017  | 5  |
| COVID19 positive hospitalized vs COVID19 negative or unknown | <i>RNF166</i>    | M1 | <1% | 1.2730 0.270 6.009       | 7.60E-01 | 2018 20   | 525472880 0     | 0.00027 | 16:89117727     | 420160 | 15 |
| COVID19 positive hospitalized vs COVID19 negative or unknown | <i>CCR3</i>      | M1 | <1% | 0.8560 0.309 2.372       | 7.70E-01 | 2017 30   | 525195568 2     | 0.00054 | 3:45859597:C:T  | 404806 | 10 |
| COVID19 positive hospitalized vs COVID19 negative or unknown | <i>ZNF175</i>    | M1 | <1% | 0.8880 0.400 1.975       | 7.70E-01 | 2081 40   | 533617 1345 3   | 0.00126 | 19:51739497     | 166168 | 12 |
| COVID19 positive hospitalized vs COVID19 negative or unknown | <i>ZNF175</i>    | M3 | <1% | 0.8880 0.400 1.975       | 7.70E-01 | 2081 40   | 533617 1345 3   | 0.00126 | 19:51739497     | 166168 | 12 |
| COVID19 positive hospitalized vs COVID19 negative or unknown | <i>PABPN1L</i>   | M1 | <1% | 0.8340 0.238 2.922       | 7.80E-01 | 2083 20   | 53469595 1      | 0.00056 | 16:89117727     | 253991 | 7  |
| COVID19 positive hospitalized vs COVID19 negative or unknown | <i>RALGDS</i>    | M1 | <1% | 1.2520 0.274 5.532       | 7.90E-01 | 2083 20   | 534643431 0     | 0.00031 | 9:133270015:A:C | 171429 | 13 |
| COVID19 positive hospitalized vs COVID19 negative or unknown | <i>TMEM8C</i>    | M3 | <1% | 0.8440 0.235 3.029       | 7.90E-01 | 2083 20   | 534301664 0     | 0.00062 | 9:133270015:A:C | 244620 | 18 |
| COVID19 positive hospitalized vs COVID19 negative or unknown | <i>CBX16</i>     | M3 | <1% | 0.9240 0.509 1.677       | 7.90E-01 | 2076 81   | 53244525 17 3   | 0.00236 | 19:4719431:G:A  | 27393  | 14 |
| COVID19 positive hospitalized vs COVID19 negative or unknown | <i>IFAR1</i>     | M1 | <1% | 0.8050 0.146 4.438       | 8.00E-01 | 2019 10   | 525406359 0     | 0.00034 | 21:33252612:A:G | 72443  | 3  |
| COVID19 positive hospitalized vs COVID19 negative or unknown | <i>NRM</i>       | M3 | <1% | 0.8500 0.238 3.033       | 8.00E-01 | 2083 20   | 534283682 0     | 0.00064 | 6:31153649:G:A  | 464989 | 33 |
| COVID19 positive hospitalized vs COVID19 negative or unknown | <i>REXO4</i>     | M3 | <1% | 1.0970 0.527 2.285       | 8.00E-01 | 2077 80   | 533569 1392 4   | 0.00131 | 9:133270015:A:C | 136937 | 11 |
| COVID19 positive hospitalized vs COVID19 negative or unknown | <i>CACFD1</i>    | M3 | <1% | 0.9190 0.453 1.861       | 8.10E-01 | 2080 50   | 533381 1583 1   | 0.00148 | 9:133270015:A:C | 190051 | 11 |
| COVID19 positive hospitalized vs COVID19 negative or unknown | <i>LARS2</i>     | M1 | <1% | 0.8080 0.140 4.671       | 8.10E-01 | 2004 10   | 526142328 0     | 0.00031 | 3:45859597:C:T  | 465144 | 14 |
| COVID19 positive hospitalized vs COVID19 negative or unknown | <i>PPP1R18</i>   | M3 | <1% | 0.9090 0.427 1.937       | 8.10E-01 | 2079 60   | 5340618968 8    | 0.00085 | 6:31153649:G:A  | 476381 | 35 |
| COVID19 positive hospitalized vs COVID19 negative or unknown | <i>PPP2R1A</i>   | M1 | <1% | 0.3660 0.000 1508.610    | 8.10E-01 | 1873 00   | 508508 24 0     | 0.00002 | 19:51739497     | 450599 | 33 |
| COVID19 positive hospitalized vs COVID19 negative or unknown | <i>UHRF1</i>     | M1 | <1% | 0.3680 0.000 1325.460    | 8.10E-01 | 1873 00   | 508517 15 0     | 0.00001 | 19:4719431:G:A  | 190042 | 10 |
| COVID19 positive hospitalized vs COVID19 negative or unknown | <i>UHRF1</i>     | M3 | <1% | 0.3680 0.000 1325.460    | 8.10E-01 | 1873 00   | 508517 15 0     | 0.00001 | 19:4719431:G:A  | 190042 | 10 |
| COVID19 positive hospitalized vs COVID19 negative or unknown | <i>CDH15</i>     | M3 | <1% | 1.0690 0.605 1.891       | 8.20E-01 | 2071 30   | 532726233 6     | 0.0021  | 16:89117727     | 54104  | 2  |
| COVID19 positive hospitalized vs COVID19 negative or unknown | <i>MUC22</i>     | M1 | <1% | 0.8710 0.247 3.070       | 8.30E-01 | 1913 20   | 425252412 9     | 0.00051 | 6:31153649:G:A  | 142943 | 9  |
| COVID19 positive hospitalized vs COVID19 negative or unknown | <i>MUC22</i>     | M3 | <1% | 0.8710 0.247 3.070       | 8.30E-01 | 1913 20   | 425252412 9     | 0.00051 | 6:31153649:G:A  | 142943 | 9  |
| COVID19 positive hospitalized vs COVID19 negative or unknown | <i>SGLEC10</i>   | M1 | <1% | 1.1190 0.395 3.165       | 8.30E-01 | 1934 40   | 51573220000 0   | 0.00193 | 19:51739497     | 328399 | 23 |
| COVID19 positive hospitalized vs COVID19 negative or unknown | <i>CPNE7</i>     | M3 | <1% | 1.0480 0.644 1.708       | 8.50E-01 | 2067 180  | 5309354030 0    | 0.00377 | 16:89117727     | 458170 | 18 |
| COVID19 positive hospitalized vs COVID19 negative or unknown | <i>LTA</i>       | M1 | <1% | 0.3670 0.000 12959.200   | 8.50E-01 | 1873 00   | 50852210 0      | 0.00001 | 6:31153649:G:A  | 419093 | 24 |
| COVID19 positive hospitalized vs COVID19 negative or unknown | <i>RALGDS</i>    | M3 | <1% | 0.9540 0.589 1.545       | 8.50E-01 | 2069 160  | 53076141986 6   | 0.00393 | 9:133270015:A:C | 171429 | 13 |
| COVID19 positive hospitalized vs COVID19 negative or unknown | <i>AF1</i>       | M3 | <1% | 0.8520 0.143 5.082       | 8.60E-01 | 2084 10   | 534686 1070 0   | 0.00026 | 6:31153649:G:A  | 461680 | 32 |
| COVID19 positive hospitalized vs COVID19 negative or unknown | <i>PABPN1L</i>   | M3 | <1% | 0.9160 0.358 2.345       | 8.60E-01 | 2081 40   | 535859 11051 0  | 0.00103 | 16:89117727     | 253991 | 7  |
| COVID19 positive hospitalized vs COVID19 negative or unknown | <i>SGLEC5</i>    | M3 | <1% | 1.0360 0.692 1.549       | 8.60E-01 | 2060 25 0 | 52848461011 6   | 0.00573 | 19:51739497     | 127267 | 8  |
| COVID19 positive hospitalized vs COVID19 negative or unknown | <i>TNF</i>       | M1 | <1% | 0.3680 0.000 2777.100    | 8.60E-01 | 1873 00   | 508514 18 0     | 0.00002 | 6:31153649:G:A  | 423092 | 25 |
| COVID19 positive hospitalized vs COVID19 negative or unknown | <i>CACFD1</i>    | M1 | <1% | 1.1910 0.145 9.818       | 8.70E-01 | 2019 10   | 52559417 10     | 0.00016 | 9:133270015:A:C | 190051 | 14 |
| COVID19 positive hospitalized vs COVID19 negative or unknown | <i>CLDN22</i>    | M3 | <1% | 0.8940 0.241 3.316       | 8.70E-01 | 2083 20   | 5346133502 0    | 0.00033 | 19:51739497     | 372356 | 27 |
| COVID19 positive hospitalized vs COVID19 negative or unknown | <i>SH3GL1</i>    | M3 | <1% | 0.8950 0.240 3.344       | 8.70E-01 | 2083 20   | 5343464190 0    | 0.00058 | 19:4719431:G:A  | 357832 | 17 |
| COVID19 positive hospitalized vs COVID19 negative or unknown | <i>TNFAIP8L1</i> | M3 | <1% | 1.1900 0.143 9.890       | 8.70E-01 | 2019 10   | 5255562090 0    | 0.0002  | 19:4719431:G:A  | 67562  | 3  |
| COVID19 positive hospitalized vs COVID19 negative or unknown | <i>TSC1</i>      | M1 | <1% | 0.9120 0.307 2.703       | 8.70E-01 | 2082 30   | 5342227430 0    | 0.00069 | 9:133270015:A:C | 373781 | 23 |
| COVID19 positive hospitalized vs COVID19 negative or unknown | <i>SFT42</i>     | M1 | <1% | 0.3730 0.000 129089.000  | 8.80E-01 | 1700 0    | 10927418 0      | 0.00008 | 6:31153649:G:A  | 222162 | 13 |
| COVID19 positive hospitalized vs COVID19 negative or unknown | <i>SFT42</i>     | M3 | <1% | 0.3730 0.000 129089.000  | 8.80E-01 | 1700 0    | 10927418 0      | 0.00008 | 6:31153649:G:A  | 222162 | 13 |
| COVID19 positive hospitalized vs COVID19 negative or unknown | <i>MDC1</i>      | M3 | <1% | 0.9140 0.244 3.430       | 8.90E-01 | 2083 20   | 5344035620 0    | 0.00053 | 6:31153649:G:A  | 453185 | 31 |
| COVID19 positive hospitalized vs COVID19 negative or unknown | <i>USG10L</i>    | M1 | <1% | 0.9590 0.522 1.761       | 8.90E-01 | 2078 70   | 532727236 2     | 0.00209 | 19:51739497     | 406887 | 20 |
| COVID19 positive hospitalized vs COVID19 negative or unknown | <i>CCHCR1</i>    | M3 | <1% | 0.9710 0.605 1.557       | 9.00E-01 | 2068 170  | 530623432 10    | 0.00407 | 6:31153649:G:A  | 11058  | 3  |
| COVID19 positive hospitalized vs COVID19 negative or unknown | <i>GBGT1</i>     | M1 | <1% | 0.9680 0.588 1.596       | 9.00E-01 | 2071 30   | 531599 3355 11  | 0.00316 | 9:133270015:A:C | 116439 | 10 |
| COVID19 positive hospitalized vs COVID19 negative or unknown | <i>TUBB</i>      | M1 | <1% | 0.3810 0.000 1930640.000 | 9.00E-01 | 1873 00   | 5085211 10      | 0.00001 | 6:31153649:G:A  | 433143 | 28 |
| COVID19 positive hospitalized vs COVID19 negative or unknown | <i>TUBB</i>      | M3 | <1% | 0.3810 0.000 1930640.000 | 9.00E-01 | 1873 00   | 5085211 10      | 0.00001 | 6:31153649:G:A  | 433143 | 28 |
| COVID19 positive hospitalized vs COVID19 negative or unknown | <i>MDC1</i>      | M1 | <1% | 0.9270 0.245 3.513       | 9.10E-01 | 2083 20   | 534414515 0     | 0.00051 | 6:31153649:G:A  | 453185 | 31 |
| COVID19 positive hospitalized vs COVID19 negative or unknown | <i>NFKB1L1</i>   | M3 | <1% | 1.1320 0.140 9.129       | 9.10E-01 | 2084 10   | 5346932720 0    | 0.00025 | 6:31153649:G:A  | 394045 | 22 |
| COVID19 positive hospitalized vs COVID19 negative or unknown | <i>ADAMTS13</i>  | M1 | <1% | 1.0760 0.256 4.523       | 9.20E-01 | 2083 20   | 5344405250 0    | 0.00049 | 9:133270015:A:C | 152428 | 12 |
| COVID19 positive hospitalized vs COVID19 negative or unknown | <i>ADAMTS13</i>  | M3 | <1% | 1.0760 0.256 4.523       | 9.20E-01 | 2083 20   | 5344405250 0    | 0.00049 | 9:133270015:A:C | 152428 | 12 |
| COVID19 positive hospitalized vs COVID19 negative or unknown | <i>CBF4T3</i>    | M3 | <1% | 1.0280 0.613 1.725       | 9.20E-01 | 2070 50   | 53074142231 0   | 0.00395 | 16:89117727     | 240752 | 6  |
| COVID19 positive hospitalized vs COVID19 negative or unknown | <i>FSD1</i>      | M3 | <1% | 0.3690 0.001 117.744     | 9.20E-01 | 2083 20   | 5341183430 0    | 0.00078 | 19:4719431:G:A  | 414685 | 20 |
| COVID19 positive hospitalized vs COVID19 negative or unknown | <i>SGLEC5</i>    | M1 | <1% | 1.0230 0.680 1.537       | 9.20E-01 | 2061 240  | 5290675882 16   | 0.00553 | 19:51739497     | 127267 | 8  |
| COVID19 positive hospitalized vs COVID19 negative or unknown | <i>CLDN22</i>    | M1 | <1% | 1.1050 0.137 8.938       | 9.30E-01 | 1937 10   | 5175818331 0    | 0.00018 | 19:51739497     | 372356 | 27 |
| COVID19 positive hospitalized vs COVID19 negative or unknown | <i>IL1ORB</i>    | M3 | <1% | 0.9230 0.141 6.047       | 9.30E-01 | 2017 10   | 5259013260 0    | 0.00031 | 21:33252612:A:G | 13853  | 2  |
| COVID19 positive hospitalized vs COVID19 negative or unknown | <i>BAG6</i>      | M3 | <1% | 1.0570 0.137 8.174       | 9.60E-01 | 2004 10   | 5261932743 0    | 0.00027 | 6:31153649:G:A  | 485481 | 36 |
| COVID19 positive hospitalized vs COVID19 negative or unknown | <i>STKLD1</i>    | M3 | <1% | 1.0160 0.526 1.960       | 9.60E-01 | 2076 90   | 5332501713 2    | 0.00161 | 9:133270015:A:C | 106458 | 9  |
| COVID19 positive hospitalized vs COVID19 negative or unknown | <i>CCHCR1</i>    | M1 | <1% | 0.9910 0.597 1.647       | 9.70E-01 | 2070 50   | 5312083748 9    | 0.00352 | 6:31153649:G:A  | 11058  | 3  |
| COVID19 positive hospitalized vs COVID19 negative or unknown | <i>NUDC2</i>     | M1 | <1% | 1.0390 0.135 8.008       | 9.70E-01 | 2084 10   | 5347492160 0    | 0.00002 | 5:163300447     | 153519 | 12 |
| COVID19 positive hospitalized vs COVID19 negative or unknown | <i>SPG7</i>      | M3 | <1% | 1.0040 0.786 1.283       | 9.70E-01 | 2025 600  | 51968515227 53  | 0.01433 | 16:89117727     | 390690 | 2  |
| COVID19 positive hospitalized vs COVID19 negative or unknown | <i>CDSN</i>      | M1 | <1% | 0.9860 0.255 4.140       | 9.80E-01 | 2076 90   | 53268322820 0   | 0.00213 | 6:31153649:G:A  | 37625  | 6  |
| COVID19 positive hospitalized vs COVID19 negative or unknown | <i>KDM4B</i>     | M1 | <1% | 0.9720 0.142 6.666       | 9.80E-01 | 1939 10   | 5166456250 0    | 0.0006  | 19:4719431:G:A  | 313459 | 15 |
| COVID19 positive hospitalized vs COVID19 negative or unknown | <i>MG7</i>       | M1 | <1% | 0.9770 0.140 6.842       | 9.80E-01 | 1939 10   | 508762560 0     | 0.00025 | 19:51739497     | 36731  | 26 |
| COVID19 positive hospitalized vs COVID19 negative or unknown | <i>SNAB</i>      | M3 | <1% | 1.0050 0.682 1.4         |          |           |                 |         |                 |        |    |

**Supplementary Table 9. Results from burden association tests for 14 genes related to interferon signaling.**

| Trait                                                        | Gene           | Burden test | MAF       | Odds Ratio [95% CI]  | P-value         | N cases with       |                    | N controls with |  | AAF |
|--------------------------------------------------------------|----------------|-------------|-----------|----------------------|-----------------|--------------------|--------------------|-----------------|--|-----|
|                                                              |                |             |           |                      |                 | RR RA AA genotype* | RR RA AA genotype* |                 |  |     |
| COVID19 positive hospitalized vs COVID19 negative or unknown | <i>IFNAR1</i>  | M1          | <0.1%     | 0.8 (0.15, 4.44)     | 0.8033          | 2019 1 0           | 525406 359 0       | 3.41E-04        |  |     |
| COVID19 positive hospitalized vs COVID19 negative or unknown | <i>IFNAR2</i>  | M1          | <0.1%     | 2.08 (0.62, 6.96)    | 0.2361          | 2082 3 0           | 534277 688 0       | 6.43E-04        |  |     |
| COVID19 positive hospitalized vs COVID19 negative or unknown | <i>IKBKG</i>   | M1          | <0.1%     | 0.49 (0.0, 50.22)    | 0.7634          | 1873 0 0           | 508491 31 10       | 5.00E-05        |  |     |
| COVID19 positive hospitalized vs COVID19 negative or unknown | <i>IRF3</i>    | M1          | <0.1%     | 0.96 (0.25, 3.64)    | 0.9476          | 2083 2 0           | 534559 406 0       | 3.80E-04        |  |     |
| COVID19 positive hospitalized vs COVID19 negative or unknown | <i>IRF7</i>    | M1          | <0.1%     | 1.16 (0.43, 3.18)    | 0.766           | 2082 3 0           | 534124 84 10       | 7.86E-04        |  |     |
| COVID19 positive hospitalized vs COVID19 negative or unknown | <i>IRF9</i>    | M1          | <0.1%     | 0.37 (0.0, 53.77)    | 0.696           | 1873 0 0           | 508479 53 0        | 5.19E-05        |  |     |
| COVID19 positive hospitalized vs COVID19 negative or unknown | <i>STAT1</i>   | M1          | <0.1%     | 0.37 (0.0, 126.71)   | 0.7357          | 1873 0 0           | 508490 42 0        | 4.11E-05        |  |     |
| COVID19 positive hospitalized vs COVID19 negative or unknown | <i>STAT2</i>   | M1          | <0.1%     | 0.35 (0.03, 4.44)    | 0.4215          | 1873 0 0           | 508405 127 0       | 1.24E-04        |  |     |
| COVID19 positive hospitalized vs COVID19 negative or unknown | <i>TBK1</i>    | M1          | <0.1%     | 0.37 (0.01, 11.96)   | 0.5714          | 1873 0 0           | 508445 87 0        | 8.52E-05        |  |     |
| COVID19 positive hospitalized vs COVID19 negative or unknown | <i>TICAM1</i>  | M1          | <0.1%     | 3.73 (0.19, 73.61)   | 0.387           | 1872 1 0           | 508368 164 0       | 1.62E-04        |  |     |
| COVID19 positive hospitalized vs COVID19 negative or unknown | <i>TLR3</i>    | M1          | <0.1%     | 1.13 (0.14, 8.83)    | 0.909           | 2084 1 0           | 534674 29 10       | 2.72E-04        |  |     |
| COVID19 positive hospitalized vs COVID19 negative or unknown | <i>TLR7</i>    | M1          | <0.1%     | 7.63 (1.87, 31.08)   | <b>0.004584</b> | 1872 0 1           | 508503 25 4        | 3.43E-05        |  |     |
| COVID19 positive hospitalized vs COVID19 negative or unknown | <i>TRAF3</i>   | M1          | <0.1%     | 0.37 (0.0, 733.64)   | 0.7966          | 1873 0 0           | 508504 28 0        | 2.74E-05        |  |     |
| COVID19 positive hospitalized vs COVID19 negative or unknown | <i>UNC93B1</i> | M1          | <0.1%     | 1.3 (0.27, 6.24)     | 0.741           | 1938 2 0           | 516861 409 0       | 3.96E-04        |  |     |
| COVID19 positive hospitalized vs COVID19 negative or unknown | <i>IFNAR1</i>  | M1          | <1%       | 0.8 (0.15, 4.44)     | 0.8033          | 2019 1 0           | 525406 359 0       | 3.41E-04        |  |     |
| COVID19 positive hospitalized vs COVID19 negative or unknown | <i>IFNAR2</i>  | M1          | <1%       | 2.08 (0.62, 6.96)    | 0.2361          | 2082 3 0           | 534277 688 0       | 6.43E-04        |  |     |
| COVID19 positive hospitalized vs COVID19 negative or unknown | <i>IKBKG</i>   | M1          | <1%       | 0.49 (0.0, 50.22)    | 0.7634          | 1873 0 0           | 508491 31 10       | 5.00E-05        |  |     |
| COVID19 positive hospitalized vs COVID19 negative or unknown | <i>IRF3</i>    | M1          | <1%       | 1.82 (0.54, 6.13)    | 0.3334          | 2082 2 1           | 534509 455 1       | 4.29E-04        |  |     |
| COVID19 positive hospitalized vs COVID19 negative or unknown | <i>IRF7</i>    | M1          | <1%       | 1.16 (0.43, 3.18)    | 0.766           | 2082 3 0           | 534124 84 10       | 7.86E-04        |  |     |
| COVID19 positive hospitalized vs COVID19 negative or unknown | <i>IRF9</i>    | M1          | <1%       | 0.37 (0.0, 53.77)    | 0.696           | 1873 0 0           | 508479 53 0        | 5.19E-05        |  |     |
| COVID19 positive hospitalized vs COVID19 negative or unknown | <i>STAT1</i>   | M1          | <1%       | 0.37 (0.0, 126.71)   | 0.7357          | 1873 0 0           | 508490 42 0        | 4.11E-05        |  |     |
| COVID19 positive hospitalized vs COVID19 negative or unknown | <i>STAT2</i>   | M1          | <1%       | 0.35 (0.03, 4.44)    | 0.4215          | 1873 0 0           | 508405 127 0       | 1.24E-04        |  |     |
| COVID19 positive hospitalized vs COVID19 negative or unknown | <i>TBK1</i>    | M1          | <1%       | 0.37 (0.01, 11.96)   | 0.5714          | 1873 0 0           | 508445 87 0        | 8.52E-05        |  |     |
| COVID19 positive hospitalized vs COVID19 negative or unknown | <i>TICAM1</i>  | M1          | <1%       | 3.73 (0.19, 73.61)   | 0.387           | 1872 1 0           | 508368 164 0       | 1.62E-04        |  |     |
| COVID19 positive hospitalized vs COVID19 negative or unknown | <i>TLR3</i>    | M1          | <1%       | 1.13 (0.14, 8.83)    | 0.909           | 2084 1 0           | 534674 29 10       | 2.72E-04        |  |     |
| COVID19 positive hospitalized vs COVID19 negative or unknown | <i>TLR7</i>    | M1          | <1%       | 7.63 (1.87, 31.08)   | <b>0.004584</b> | 1872 0 1           | 508503 25 4        | 3.43E-05        |  |     |
| COVID19 positive hospitalized vs COVID19 negative or unknown | <i>TRAF3</i>   | M1          | <1%       | 0.37 (0.0, 733.64)   | 0.7966          | 1873 0 0           | 508504 28 0        | 2.74E-05        |  |     |
| COVID19 positive hospitalized vs COVID19 negative or unknown | <i>UNC93B1</i> | M1          | <1%       | 1.3 (0.27, 6.24)     | 0.741           | 1938 2 0           | 516861 409 0       | 3.96E-04        |  |     |
| COVID19 positive hospitalized vs COVID19 negative or unknown | <i>IFNAR1</i>  | M1          | singleton | 0.37 (0.0, 44.0)     | 0.6857          | 1873 0 0           | 508477 55 0        | 5.39E-05        |  |     |
| COVID19 positive hospitalized vs COVID19 negative or unknown | <i>IFNAR2</i>  | M1          | singleton | 0.36 (0.0, 179.42)   | 0.7463          | 1873 0 0           | 508500 32 0        | 3.13E-05        |  |     |
| COVID19 positive hospitalized vs COVID19 negative or unknown | <i>IKBKG</i>   | M1          | singleton | 0.55 (0.0, 2706.13)  | 0.8906          | 1873 0 0           | 508523 7 2         | 1.08E-05        |  |     |
| COVID19 positive hospitalized vs COVID19 negative or unknown | <i>IRF3</i>    | M1          | singleton | 0.37 (0.0, 113.18)   | 0.7313          | 1873 0 0           | 508495 37 0        | 3.62E-05        |  |     |
| COVID19 positive hospitalized vs COVID19 negative or unknown | <i>IRF7</i>    | M1          | singleton | 0.37 (0.0, 64.55)    | 0.7071          | 1873 0 0           | 508481 51 0        | 5.00E-05        |  |     |
| COVID19 positive hospitalized vs COVID19 negative or unknown | <i>IRF9</i>    | M1          | singleton | 0.37 (0.0, 249.69)   | 0.7666          | 1873 0 0           | 508505 27 0        | 2.64E-05        |  |     |
| COVID19 positive hospitalized vs COVID19 negative or unknown | <i>STAT1</i>   | M1          | singleton | 0.37 (0.0, 301.54)   | 0.7688          | 1873 0 0           | 508502 30 0        | 2.94E-05        |  |     |
| COVID19 positive hospitalized vs COVID19 negative or unknown | <i>STAT2</i>   | M1          | singleton | 0.37 (0.0, 37.61)    | 0.6705          | 1873 0 0           | 508487 45 0        | 4.41E-05        |  |     |
| COVID19 positive hospitalized vs COVID19 negative or unknown | <i>TBK1</i>    | M1          | singleton | 0.36 (0.0, 86.69)    | 0.7179          | 1873 0 0           | 508501 31 0        | 3.04E-05        |  |     |
| COVID19 positive hospitalized vs COVID19 negative or unknown | <i>TICAM1</i>  | M1          | singleton | 18.3 (1.71, 196.34)  | <b>0.01636</b>  | 1872 1 0           | 508489 43 0        | 4.31E-05        |  |     |
| COVID19 positive hospitalized vs COVID19 negative or unknown | <i>TLR3</i>    | M1          | singleton | 15.34 (1.46, 161.33) | <b>0.02294</b>  | 1939 1 0           | 517242 28 0        | 2.79E-05        |  |     |
| COVID19 positive hospitalized vs COVID19 negative or unknown | <i>TLR7</i>    | M1          | singleton | 12.49 (2.71, 57.56)  | <b>0.001198</b> | 1872 0 1           | 508520 10 2        | 1.57E-05        |  |     |
| COVID19 positive hospitalized vs COVID19 negative or unknown | <i>TRAF3</i>   | M1          | singleton | 0.37 (0.0, 8930.06)  | 0.8463          | 1873 0 0           | 508514 18 0        | 1.76E-05        |  |     |
| COVID19 positive hospitalized vs COVID19 negative or unknown | <i>UNC93B1</i> | M1          | singleton | 0.37 (0.0, 186.54)   | 0.7539          | 1873 0 0           | 508489 43 0        | 4.21E-05        |  |     |
| COVID19 positive hospitalized vs COVID19 negative or unknown | <i>IFNAR1</i>  | M3          | <0.1%     | 0.76 (0.23, 2.44)    | 0.64            | 2083 2 0           | 534219 746 0       | 6.96E-04        |  |     |
| COVID19 positive hospitalized vs COVID19 negative or unknown | <i>IFNAR2</i>  | M3          | <0.1%     | 1.97 (0.6, 6.47)     | 0.2651          | 2082 3 0           | 534253 712 0       | 6.66E-04        |  |     |
| COVID19 positive hospitalized vs COVID19 negative or unknown | <i>IKBKG</i>   | M3          | <0.1%     | 0.45 (0.01, 19.74)   | 0.6761          | 1873 0 0           | 508452 70 10       | 8.82E-05        |  |     |
| COVID19 positive hospitalized vs COVID19 negative or unknown | <i>IRF3</i>    | M3          | <0.1%     | 0.79 (0.24, 2.59)    | 0.692           | 2083 2 0           | 534413 552 0       | 5.16E-04        |  |     |
| COVID19 positive hospitalized vs COVID19 negative or unknown | <i>IRF7</i>    | M3          | <0.1%     | 1.14 (0.52, 2.49)    | 0.7481          | 2080 5 0           | 533486 1479 0      | 1.38E-03        |  |     |
| COVID19 positive hospitalized vs COVID19 negative or unknown | <i>IRF9</i>    | M3          | <0.1%     | 0.37 (0.0, 53.77)    | 0.696           | 1873 0 0           | 508479 53 0        | 5.19E-05        |  |     |

|                                                              |                |    |           |                       |                 |           |                |          |
|--------------------------------------------------------------|----------------|----|-----------|-----------------------|-----------------|-----------|----------------|----------|
| COVID19 positive hospitalized vs COVID19 negative or unknown | <i>STAT1</i>   | M3 | <0.1%     | 0.37 (0.04, 3.49)     | 0.3816          | 2018 0 0  | 526009 218 0   | 2.06E-04 |
| COVID19 positive hospitalized vs COVID19 negative or unknown | <i>STAT2</i>   | M3 | <0.1%     | 2.6 (1.27, 5.31)      | <b>0.008795</b> | 2073 12 0 | 533405 1559 1  | 1.46E-03 |
| COVID19 positive hospitalized vs COVID19 negative or unknown | <i>TBK1</i>    | M3 | <0.1%     | 1.11 (0.45, 2.79)     | 0.8171          | 2081 4 0  | 533861 1103 1  | 1.03E-03 |
| COVID19 positive hospitalized vs COVID19 negative or unknown | <i>TICAM1</i>  | M3 | <0.1%     | 3.66 (0.19, 71.22)    | 0.392           | 1872 1 0  | 508365 167 0   | 1.65E-04 |
| COVID19 positive hospitalized vs COVID19 negative or unknown | <i>TLR3</i>    | M3 | <0.1%     | 0.81 (0.43, 1.49)     | 0.4921          | 2077 8 0  | 532355 2609 1  | 2.44E-03 |
| COVID19 positive hospitalized vs COVID19 negative or unknown | <i>TLR7</i>    | M3 | <0.1%     | 1.58 (0.63, 3.98)     | 0.3321          | 2001 3 1  | 525830 477 163 | 7.64E-04 |
| COVID19 positive hospitalized vs COVID19 negative or unknown | <i>TRAF3</i>   | M3 | <0.1%     | 3.01 (0.53, 17.22)    | 0.2148          | 2019 1 0  | 525523 242 0   | 2.30E-04 |
| COVID19 positive hospitalized vs COVID19 negative or unknown | <i>UNC93B1</i> | M3 | <0.1%     | 1.66 (0.77, 3.58)     | 0.1922          | 2075 10 0 | 533331 1634 0  | 1.53E-03 |
| COVID19 positive hospitalized vs COVID19 negative or unknown | <i>IFNAR1</i>  | M3 | <1%       | 0.76 (0.23, 2.44)     | 0.64            | 2083 2 0  | 534219 746 0   | 6.96E-04 |
| COVID19 positive hospitalized vs COVID19 negative or unknown | <i>IFNAR2</i>  | M3 | <1%       | 1.97 (0.6, 6.47)      | 0.2651          | 2082 3 0  | 534253 712 0   | 6.66E-04 |
| COVID19 positive hospitalized vs COVID19 negative or unknown | <i>IKBKKG</i>  | M3 | <1%       | 1.04 (0.54, 2.01)     | 0.9101          | 1935 0 3  | 516444 949 339 | 1.57E-03 |
| COVID19 positive hospitalized vs COVID19 negative or unknown | <i>IRF3</i>    | M3 | <1%       | 1.38 (0.46, 4.15)     | 0.5704          | 2082 2 1  | 534363 601 1   | 5.65E-04 |
| COVID19 positive hospitalized vs COVID19 negative or unknown | <i>IRF7</i>    | M3 | <1%       | 1.14 (0.52, 2.49)     | 0.7481          | 2080 5 0  | 533486 1479 0  | 1.38E-03 |
| COVID19 positive hospitalized vs COVID19 negative or unknown | <i>IRF9</i>    | M3 | <1%       | 0.37 (0.0, 53.77)     | 0.696           | 1873 0 0  | 508479 53 0    | 5.19E-05 |
| COVID19 positive hospitalized vs COVID19 negative or unknown | <i>STAT1</i>   | M3 | <1%       | 0.37 (0.04, 3.49)     | 0.3816          | 2018 0 0  | 526009 218 0   | 2.06E-04 |
| COVID19 positive hospitalized vs COVID19 negative or unknown | <i>STAT2</i>   | M3 | <1%       | 2.6 (1.27, 5.31)      | <b>0.008795</b> | 2073 12 0 | 533405 1559 1  | 1.46E-03 |
| COVID19 positive hospitalized vs COVID19 negative or unknown | <i>TBK1</i>    | M3 | <1%       | 1.11 (0.45, 2.79)     | 0.8171          | 2081 4 0  | 533861 1103 1  | 1.03E-03 |
| COVID19 positive hospitalized vs COVID19 negative or unknown | <i>TICAM1</i>  | M3 | <1%       | 3.66 (0.19, 71.22)    | 0.392           | 1872 1 0  | 508365 167 0   | 1.65E-04 |
| COVID19 positive hospitalized vs COVID19 negative or unknown | <i>TLR3</i>    | M3 | <1%       | 0.83 (0.42, 1.32)     | 0.4285          | 2070 15 0 | 530068 4895 2  | 4.57E-03 |
| COVID19 positive hospitalized vs COVID19 negative or unknown | <i>TLR7</i>    | M3 | <1%       | 1.58 (0.63, 3.98)     | 0.3321          | 2001 3 1  | 525830 477 163 | 7.64E-04 |
| COVID19 positive hospitalized vs COVID19 negative or unknown | <i>TRAF3</i>   | M3 | <1%       | 0.89 (0.48, 1.65)     | 0.711           | 2076 9 0  | 532255 2706 4  | 2.54E-03 |
| COVID19 positive hospitalized vs COVID19 negative or unknown | <i>UNC93B1</i> | M3 | <1%       | 1.66 (0.77, 3.58)     | 0.1922          | 2075 10 0 | 533331 1634 0  | 1.53E-03 |
| COVID19 positive hospitalized vs COVID19 negative or unknown | <i>IFNAR1</i>  | M3 | singleton | 0.37 (0.01, 20.63)    | 0.6273          | 1873 0 0  | 508465 67 0    | 6.56E-05 |
| COVID19 positive hospitalized vs COVID19 negative or unknown | <i>IFNAR2</i>  | M3 | singleton | 0.36 (0.0, 138.92)    | 0.7352          | 1873 0 0  | 508498 34 0    | 3.33E-05 |
| COVID19 positive hospitalized vs COVID19 negative or unknown | <i>IKBKKG</i>  | M3 | singleton | 0.55 (0.0, 2553.85)   | 0.889           | 1873 0 0  | 508522 8 2     | 1.18E-05 |
| COVID19 positive hospitalized vs COVID19 negative or unknown | <i>IRF3</i>    | M3 | singleton | 0.37 (0.0, 46.47)     | 0.687           | 1940 0 0  | 517212 58 0    | 5.59E-05 |
| COVID19 positive hospitalized vs COVID19 negative or unknown | <i>IRF7</i>    | M3 | singleton | 2.94 (0.17, 51.0)     | 0.4591          | 2004 1 0  | 526371 99 0    | 9.46E-05 |
| COVID19 positive hospitalized vs COVID19 negative or unknown | <i>IRF9</i>    | M3 | singleton | 0.37 (0.0, 249.69)    | 0.7666          | 1873 0 0  | 508505 27 0    | 2.64E-05 |
| COVID19 positive hospitalized vs COVID19 negative or unknown | <i>STAT1</i>   | M3 | singleton | 0.37 (0.01, 19.67)    | 0.6207          | 1873 0 0  | 508458 74 0    | 7.25E-05 |
| COVID19 positive hospitalized vs COVID19 negative or unknown | <i>STAT2</i>   | M3 | singleton | 35.11 (4.02, 306.33)  | <b>0.001283</b> | 2018 2 0  | 525651 114 0   | 1.10E-04 |
| COVID19 positive hospitalized vs COVID19 negative or unknown | <i>TBK1</i>    | M3 | singleton | 0.37 (0.02, 8.91)     | 0.5401          | 2005 0 0  | 526361 109 0   | 1.03E-04 |
| COVID19 positive hospitalized vs COVID19 negative or unknown | <i>TICAM1</i>  | M3 | singleton | 17.91 (1.68, 190.85)  | <b>0.01686</b>  | 1872 1 0  | 508486 46 0    | 4.60E-05 |
| COVID19 positive hospitalized vs COVID19 negative or unknown | <i>TLR3</i>    | M3 | singleton | 0.93 (0.14, 6.19)     | 0.943           | 2084 1 0  | 534786 178 1   | 1.69E-04 |
| COVID19 positive hospitalized vs COVID19 negative or unknown | <i>TLR7</i>    | M3 | singleton | 4.02 (1.16, 13.91)    | <b>0.02818</b>  | 1939 0 1  | 517197 55 18   | 8.96E-05 |
| COVID19 positive hospitalized vs COVID19 negative or unknown | <i>TRAF3</i>   | M3 | singleton | 0.37 (0.01, 21.93)    | 0.6308          | 1873 0 0  | 508461 71 0    | 6.96E-05 |
| COVID19 positive hospitalized vs COVID19 negative or unknown | <i>UNC93B1</i> | M3 | singleton | 0.38 (0.01, 12.45)    | 0.5832          | 1953 0 0  | 516939 88 0    | 8.48E-05 |
| COVID19 positive severe vs COVID19 negative or unknown       | <i>IFNAR1</i>  | M1 | <0.1%     | 2.62 (0.18, 38.8)     | 0.4837          | 571 1 0   | 516685 342 0   | 3.31E-04 |
| COVID19 positive severe vs COVID19 negative or unknown       | <i>IFNAR2</i>  | M1 | <0.1%     | 1.97 (0.17, 22.68)    | 0.5855          | 589 1 0   | 525553 674 0   | 6.41E-04 |
| COVID19 positive severe vs COVID19 negative or unknown       | <i>IKBKKG</i>  | M1 | <0.1%     | 14.74 (1.12, 193.22)  | <b>0.04042</b>  | 539 0 0   | 508491 31 10   | 5.01E-05 |
| COVID19 positive severe vs COVID19 negative or unknown       | <i>IRF3</i>    | M1 | <0.1%     | 3.02 (0.6, 15.18)     | 0.1793          | 589 1 0   | 525854 373 0   | 3.55E-04 |
| COVID19 positive severe vs COVID19 negative or unknown       | <i>IRF7</i>    | M1 | <0.1%     | 2.68 (0.39, 18.58)    | 0.3189          | 588 2 0   | 525395 832 0   | 7.92E-04 |
| COVID19 positive severe vs COVID19 negative or unknown       | <i>IRF9</i>    | M1 | <0.1%     | 0.42 (0.0, 5297.95)   | 0.8575          | 539 0 0   | 508479 53 0    | 5.21E-05 |
| COVID19 positive severe vs COVID19 negative or unknown       | <i>STAT1</i>   | M1 | <0.1%     | 0.38 (0.0, 3004.31)   | 0.8315          | 539 0 0   | 508490 42 0    | 4.13E-05 |
| COVID19 positive severe vs COVID19 negative or unknown       | <i>STAT2</i>   | M1 | <0.1%     | 0.37 (0.0, 38.82)     | 0.6778          | 539 0 0   | 508405 127 0   | 1.25E-04 |
| COVID19 positive severe vs COVID19 negative or unknown       | <i>TBK1</i>    | M1 | <0.1%     | 0.38 (0.0, 211.44)    | 0.7619          | 539 0 0   | 508445 87 0    | 8.54E-05 |
| COVID19 positive severe vs COVID19 negative or unknown       | <i>TICAM1</i>  | M1 | <0.1%     | 0.89 (0.05, 15.25)    | 0.9349          | 539 0 0   | 508368 164 0   | 1.61E-04 |
| COVID19 positive severe vs COVID19 negative or unknown       | <i>TLR3</i>    | M1 | <0.1%     | 0.41 (0.01, 21.61)    | 0.6594          | 590 0 0   | 525950 277 0   | 2.63E-04 |
| COVID19 positive severe vs COVID19 negative or unknown       | <i>TLR7</i>    | M1 | <0.1%     | 42.12 (0.51, 3486.63) | 0.0969          | 539 0 0   | 508503 25 4    | 3.24E-05 |
| COVID19 positive severe vs COVID19 negative or unknown       | <i>TRAF3</i>   | M1 | <0.1%     | 0.43 (0.0, 281622.0)  | 0.9011          | 539 0 0   | 508504 28 0    | 2.75E-05 |
| COVID19 positive severe vs COVID19 negative or unknown       | <i>UNC93B1</i> | M1 | <0.1%     | 3.35 (0.18, 61.63)    | 0.4157          | 538 1 0   | 508128 404 0   | 3.98E-04 |
| COVID19 positive severe vs COVID19 negative or unknown       | <i>IFNAR1</i>  | M1 | <1%       | 2.62 (0.18, 38.8)     | 0.4837          | 571 1 0   | 516685 342 0   | 3.31E-04 |



|                                                        |                |    |           |                         |                |         |                |          |
|--------------------------------------------------------|----------------|----|-----------|-------------------------|----------------|---------|----------------|----------|
| COVID19 positive severe vs COVID19 negative or unknown | <i>IFNAR2</i>  | M1 | <1%       | 1.97 (0.17, 22.68)      | 0.5855         | 589 1 0 | 525553 674 0   | 6.41E-04 |
| COVID19 positive severe vs COVID19 negative or unknown | <i>IKBKKG</i>  | M1 | <1%       | 14.74 (1.12, 193.22)    | <b>0.04042</b> | 539 0 0 | 508491 31 10   | 5.01E-05 |
| COVID19 positive severe vs COVID19 negative or unknown | <i>IRF3</i>    | M1 | <1%       | 3.02 (0.6, 15.18)       | 0.1793         | 589 1 0 | 525854 373 0   | 3.55E-04 |
| COVID19 positive severe vs COVID19 negative or unknown | <i>IRF7</i>    | M1 | <1%       | 2.68 (0.39, 18.58)      | 0.3189         | 588 2 0 | 525395 832 0   | 7.92E-04 |
| COVID19 positive severe vs COVID19 negative or unknown | <i>IRF9</i>    | M1 | <1%       | 0.42 (0.0, 5297.95)     | 0.8575         | 539 0 0 | 508479 53 0    | 5.21E-05 |
| COVID19 positive severe vs COVID19 negative or unknown | <i>STAT1</i>   | M1 | <1%       | 0.38 (0.0, 3004.31)     | 0.8315         | 539 0 0 | 508490 42 0    | 4.13E-05 |
| COVID19 positive severe vs COVID19 negative or unknown | <i>STAT2</i>   | M1 | <1%       | 0.37 (0.0, 38.82)       | 0.6778         | 539 0 0 | 508405 127 0   | 1.25E-04 |
| COVID19 positive severe vs COVID19 negative or unknown | <i>TBK1</i>    | M1 | <1%       | 0.38 (0.0, 211.44)      | 0.7619         | 539 0 0 | 508445 87 0    | 8.54E-05 |
| COVID19 positive severe vs COVID19 negative or unknown | <i>TICAM1</i>  | M1 | <1%       | 0.89 (0.05, 15.25)      | 0.9349         | 539 0 0 | 508368 164 0   | 1.61E-04 |
| COVID19 positive severe vs COVID19 negative or unknown | <i>TLR3</i>    | M1 | <1%       | 0.41 (0.01, 21.61)      | 0.6594         | 590 0 0 | 525950 277 0   | 2.63E-04 |
| COVID19 positive severe vs COVID19 negative or unknown | <i>TLR7</i>    | M1 | <1%       | 42.12 (0.51, 3486.63)   | 0.0969         | 539 0 0 | 508503 25 4    | 3.24E-05 |
| COVID19 positive severe vs COVID19 negative or unknown | <i>TRAF3</i>   | M1 | <1%       | 0.43 (0.0, 281622.0)    | 0.9011         | 539 0 0 | 508504 28 0    | 2.75E-05 |
| COVID19 positive severe vs COVID19 negative or unknown | <i>UNC93B1</i> | M1 | <1%       | 3.35 (0.18, 61.63)      | 0.4157         | 538 1 0 | 508128 404 0   | 3.98E-04 |
| COVID19 positive severe vs COVID19 negative or unknown | <i>IFNAR1</i>  | M1 | singleton | 0.37 (0.0, 165.53)      | 0.7518         | 539 0 0 | 508477 55 0    | 5.40E-05 |
| COVID19 positive severe vs COVID19 negative or unknown | <i>IFNAR2</i>  | M1 | singleton | 0.48 (0.0, 901579.0)    | 0.9216         | 539 0 0 | 508500 32 0    | 3.14E-05 |
| COVID19 positive severe vs COVID19 negative or unknown | <i>IKBKKG</i>  | M1 | singleton | 0.58 (0.0, 711727.0)    | 0.939          | 490 0 0 | 399233 6 1     | 1.00E-05 |
| COVID19 positive severe vs COVID19 negative or unknown | <i>IRF3</i>    | M1 | singleton | 24.01 (0.35, 1669.95)   | 0.1419         | 539 0 0 | 508495 37 0    | 3.63E-05 |
| COVID19 positive severe vs COVID19 negative or unknown | <i>IRF7</i>    | M1 | singleton | 0.45 (0.0, 19828.4)     | 0.8843         | 539 0 0 | 508481 51 0    | 5.01E-05 |
| COVID19 positive severe vs COVID19 negative or unknown | <i>IRF9</i>    | M1 | singleton | 0.45 (0.0, 564343.0)    | 0.9115         | 539 0 0 | 508505 27 0    | 2.65E-05 |
| COVID19 positive severe vs COVID19 negative or unknown | <i>STAT1</i>   | M1 | singleton | 0.38 (0.0, 9818.87)     | 0.8505         | 539 0 0 | 508502 30 0    | 2.95E-05 |
| COVID19 positive severe vs COVID19 negative or unknown | <i>STAT2</i>   | M1 | singleton | 0.39 (0.0, 13826.4)     | 0.861          | 539 0 0 | 508487 45 0    | 4.42E-05 |
| COVID19 positive severe vs COVID19 negative or unknown | <i>TBK1</i>    | M1 | singleton | 0.38 (0.0, 28255.6)     | 0.8649         | 539 0 0 | 508501 31 0    | 3.04E-05 |
| COVID19 positive severe vs COVID19 negative or unknown | <i>TICAM1</i>  | M1 | singleton | 15.49 (0.28, 860.18)    | 0.1812         | 539 0 0 | 508489 43 0    | 4.22E-05 |
| COVID19 positive severe vs COVID19 negative or unknown | <i>TLR3</i>    | M1 | singleton | 0.38 (0.0, 18335.2)     | 0.8602         | 539 0 0 | 508509 23 0    | 2.26E-05 |
| COVID19 positive severe vs COVID19 negative or unknown | <i>TLR7</i>    | M1 | singleton | 0.4 (0.0, 3891300000.0) | 0.9371         | 490 0 0 | 399229 9 2     | 1.63E-05 |
| COVID19 positive severe vs COVID19 negative or unknown | <i>TRAF3</i>   | M1 | singleton | 0.42 (0.0, 1871470.0)   | 0.9114         | 539 0 0 | 508514 18 0    | 1.77E-05 |
| COVID19 positive severe vs COVID19 negative or unknown | <i>UNC93B1</i> | M1 | singleton | 0.42 (0.0, 20393.0)     | 0.8758         | 539 0 0 | 508489 43 0    | 4.22E-05 |
| COVID19 positive severe vs COVID19 negative or unknown | <i>IFNAR1</i>  | M3 | <0.1%     | 1.07 (0.15, 7.68)       | 0.9458         | 589 1 0 | 525500 727 0   | 6.91E-04 |
| COVID19 positive severe vs COVID19 negative or unknown | <i>IFNAR2</i>  | M3 | <0.1%     | 1.88 (0.17, 20.82)      | 0.6068         | 589 1 0 | 525529 698 0   | 6.63E-04 |
| COVID19 positive severe vs COVID19 negative or unknown | <i>IKBKKG</i>  | M3 | <0.1%     | 12.55 (0.99, 159.28)    | 0.051          | 539 0 0 | 508452 70 10   | 8.84E-05 |
| COVID19 positive severe vs COVID19 negative or unknown | <i>IRF3</i>    | M3 | <0.1%     | 2.53 (0.54, 11.8)       | 0.2388         | 589 1 0 | 525713 514 0   | 4.89E-04 |
| COVID19 positive severe vs COVID19 negative or unknown | <i>IRF7</i>    | M3 | <0.1%     | 3.07 (0.81, 11.64)      | 0.09817        | 587 3 0 | 524764 1463 0  | 1.39E-03 |
| COVID19 positive severe vs COVID19 negative or unknown | <i>IRF9</i>    | M3 | <0.1%     | 0.42 (0.0, 5297.95)     | 0.8575         | 539 0 0 | 508479 53 0    | 5.21E-05 |
| COVID19 positive severe vs COVID19 negative or unknown | <i>STAT1</i>   | M3 | <0.1%     | 0.38 (0.01, 14.6)       | 0.6027         | 590 0 0 | 526009 218 0   | 2.07E-04 |
| COVID19 positive severe vs COVID19 negative or unknown | <i>STAT2</i>   | M3 | <0.1%     | 1.64 (0.36, 7.55)       | 0.5246         | 587 3 0 | 524718 1508 1  | 1.44E-03 |
| COVID19 positive severe vs COVID19 negative or unknown | <i>TBK1</i>    | M3 | <0.1%     | 1.96 (0.33, 11.47)      | 0.456          | 588 2 0 | 525137 1089 1  | 1.04E-03 |
| COVID19 positive severe vs COVID19 negative or unknown | <i>TICAM1</i>  | M3 | <0.1%     | 0.89 (0.05, 15.22)      | 0.9349         | 539 0 0 | 508365 167 0   | 1.64E-04 |
| COVID19 positive severe vs COVID19 negative or unknown | <i>TLR3</i>    | M3 | <0.1%     | 0.74 (0.24, 2.26)       | 0.5951         | 588 2 0 | 523680 2546 1  | 2.42E-03 |
| COVID19 positive severe vs COVID19 negative or unknown | <i>TLR7</i>    | M3 | <0.1%     | 1.22 (0.29, 5.15)       | 0.7855         | 557 0 0 | 517105 467 160 | 7.59E-04 |
| COVID19 positive severe vs COVID19 negative or unknown | <i>TRAF3</i>   | M3 | <0.1%     | 14.61 (1.54, 138.27)    | <b>0.01935</b> | 571 1 0 | 516792 235 0   | 2.28E-04 |
| COVID19 positive severe vs COVID19 negative or unknown | <i>UNC93B1</i> | M3 | <0.1%     | 3.13 (1.26, 7.77)       | <b>0.01414</b> | 584 6 0 | 524612 1615 0  | 1.54E-03 |
| COVID19 positive severe vs COVID19 negative or unknown | <i>IFNAR1</i>  | M3 | <1%       | 1.07 (0.15, 7.68)       | 0.9458         | 589 1 0 | 525500 727 0   | 6.91E-04 |
| COVID19 positive severe vs COVID19 negative or unknown | <i>IFNAR2</i>  | M3 | <1%       | 1.88 (0.17, 20.82)      | 0.6068         | 589 1 0 | 525529 698 0   | 6.63E-04 |
| COVID19 positive severe vs COVID19 negative or unknown | <i>IKBKKG</i>  | M3 | <1%       | 1.41 (0.48, 4.17)       | 0.5303         | 556 0 1 | 516444 949 339 | 1.57E-03 |
| COVID19 positive severe vs COVID19 negative or unknown | <i>IRF3</i>    | M3 | <1%       | 2.53 (0.54, 11.8)       | 0.2388         | 589 1 0 | 525713 514 0   | 4.89E-04 |
| COVID19 positive severe vs COVID19 negative or unknown | <i>IRF7</i>    | M3 | <1%       | 3.07 (0.81, 11.64)      | 0.09817        | 587 3 0 | 524764 1463 0  | 1.39E-03 |
| COVID19 positive severe vs COVID19 negative or unknown | <i>IRF9</i>    | M3 | <1%       | 0.42 (0.0, 5297.95)     | 0.8575         | 539 0 0 | 508479 53 0    | 5.21E-05 |
| COVID19 positive severe vs COVID19 negative or unknown | <i>STAT1</i>   | M3 | <1%       | 0.38 (0.01, 14.6)       | 0.6027         | 590 0 0 | 526009 218 0   | 2.07E-04 |
| COVID19 positive severe vs COVID19 negative or unknown | <i>STAT2</i>   | M3 | <1%       | 1.64 (0.36, 7.55)       | 0.5246         | 587 3 0 | 524718 1508 1  | 1.44E-03 |
| COVID19 positive severe vs COVID19 negative or unknown | <i>TBK1</i>    | M3 | <1%       | 1.96 (0.33, 11.47)      | 0.456          | 588 2 0 | 525137 1089 1  | 1.04E-03 |
| COVID19 positive severe vs COVID19 negative or unknown | <i>TICAM1</i>  | M3 | <1%       | 0.89 (0.05, 15.22)      | 0.9349         | 539 0 0 | 508365 167 0   | 1.64E-04 |

|                                                        |                |    |           |                       |                |         |                |          |
|--------------------------------------------------------|----------------|----|-----------|-----------------------|----------------|---------|----------------|----------|
| COVID19 positive severe vs COVID19 negative or unknown | <i>TLR3</i>    | M3 | <1%       | 0.97 (0.41, 2.26)     | 0.9396         | 585 5 0 | 521403 4822 2  | 4.59E-03 |
| COVID19 positive severe vs COVID19 negative or unknown | <i>TLR7</i>    | M3 | <1%       | 1.22 (0.29, 5.15)     | 0.7855         | 557 0 0 | 517105 467 160 | 7.59E-04 |
| COVID19 positive severe vs COVID19 negative or unknown | <i>TRAF3</i>   | M3 | <1%       | 1.27 (0.49, 3.25)     | 0.6217         | 587 3 0 | 523530 2693 4  | 2.57E-03 |
| COVID19 positive severe vs COVID19 negative or unknown | <i>UNC93B1</i> | M3 | <1%       | 3.13 (1.26, 7.77)     | <b>0.01414</b> | 584 6 0 | 524612 1615 0  | 1.54E-03 |
| COVID19 positive severe vs COVID19 negative or unknown | <i>IFNAR1</i>  | M3 | singleton | 0.37 (0.0, 119.72)    | 0.738          | 539 0 0 | 508465 67 0    | 6.58E-05 |
| COVID19 positive severe vs COVID19 negative or unknown | <i>IFNAR2</i>  | M3 | singleton | 0.47 (0.0, 448932.0)  | 0.9144         | 539 0 0 | 508498 34 0    | 3.34E-05 |
| COVID19 positive severe vs COVID19 negative or unknown | <i>IKBK1</i>   | M3 | singleton | 0.57 (0.0, 614503.0)  | 0.9374         | 490 0 0 | 399232 7 1     | 1.13E-05 |
| COVID19 positive severe vs COVID19 negative or unknown | <i>IRF3</i>    | M3 | singleton | 20.95 (0.32, 1352.58) | 0.1525         | 539 0 0 | 508480 52 0    | 5.11E-05 |
| COVID19 positive severe vs COVID19 negative or unknown | <i>IRF7</i>    | M3 | singleton | 0.42 (0.0, 600.62)    | 0.8166         | 557 0 0 | 517640 92 0    | 8.88E-05 |
| COVID19 positive severe vs COVID19 negative or unknown | <i>IRF9</i>    | M3 | singleton | 0.45 (0.0, 564343.0)  | 0.9115         | 539 0 0 | 508505 27 0    | 2.65E-05 |
| COVID19 positive severe vs COVID19 negative or unknown | <i>STAT1</i>   | M3 | singleton | 0.38 (0.0, 269.14)    | 0.7735         | 539 0 0 | 508458 74 0    | 7.27E-05 |
| COVID19 positive severe vs COVID19 negative or unknown | <i>STAT2</i>   | M3 | singleton | 0.4 (0.0, 128.93)     | 0.7543         | 572 0 0 | 516919 108 0   | 1.04E-04 |
| COVID19 positive severe vs COVID19 negative or unknown | <i>TBK1</i>    | M3 | singleton | 0.38 (0.0, 184.6)     | 0.7614         | 557 0 0 | 517628 104 0   | 1.00E-04 |
| COVID19 positive severe vs COVID19 negative or unknown | <i>TICAM1</i>  | M3 | singleton | 15.0 (0.27, 819.65)   | 0.1846         | 539 0 0 | 508486 46 0    | 4.52E-05 |
| COVID19 positive severe vs COVID19 negative or unknown | <i>TLR3</i>    | M3 | singleton | 0.41 (0.01, 15.67)    | 0.6287         | 590 0 0 | 526065 161 1   | 1.55E-04 |
| COVID19 positive severe vs COVID19 negative or unknown | <i>TLR7</i>    | M3 | singleton | 11.63 (0.84, 161.65)  | 0.06761        | 539 0 0 | 508468 49 15   | 7.76E-05 |
| COVID19 positive severe vs COVID19 negative or unknown | <i>TRAF3</i>   | M3 | singleton | 0.4 (0.0, 689.93)     | 0.8098         | 539 0 0 | 508461 71 0    | 6.97E-05 |
| COVID19 positive severe vs COVID19 negative or unknown | <i>UNC93B1</i> | M3 | singleton | 0.42 (0.0, 250.75)    | 0.7916         | 572 0 0 | 516939 88 0    | 8.50E-05 |

\* RR: individuals who have genotype Reference/Reference for all variants included in burden test. RA: individuals who have genotype Reference/Alternate for at least one variant. AA: individuals who have genotype Alternate/Alternate for at least one variant.

**Supplementary Table 10. Results from burden association tests for 32 additional genes of biological or therapeutic interest.**

| Trait                                                        | Gene    | Burden test | MAF | Odds Ratio [95% CI]   | P-value  | N cases with RR RA AA genotype* | N controls with RR RA AA genotype* | AAF     |
|--------------------------------------------------------------|---------|-------------|-----|-----------------------|----------|---------------------------------|------------------------------------|---------|
| COVID19 positive hospitalized vs COVID19 negative or unknown | IL23R   | M1          | <1% | 3.849[0.853;17.373]   | 8.00E-02 | 1871 2 0                        | 508324 208 0                       | 0.00021 |
| COVID19 positive hospitalized vs COVID19 negative or unknown | IL1A    | M3          | <1% | 2.350[0.835;6.611]    | 1.10E-01 | 2016 4 0                        | 525349 415 1                       | 0.0004  |
| COVID19 positive hospitalized vs COVID19 negative or unknown | IFNL3   | M1          | <1% | 14.959[0.345;647.891] | 1.60E-01 | 1872 1 0                        | 508438 940                         | 0.00009 |
| COVID19 positive hospitalized vs COVID19 negative or unknown | IL1A    | M1          | <1% | 4.218[0.574;31.008]   | 1.60E-01 | 2019 1 0                        | 525641 124 0                       | 0.00012 |
| COVID19 positive hospitalized vs COVID19 negative or unknown | IFNL1   | M3          | <1% | 0.369[0.086;1.585]    | 1.80E-01 | 2085 0 0                        | 534569 395 1                       | 0.00037 |
| COVID19 positive hospitalized vs COVID19 negative or unknown | TMPRSS2 | M1          | <1% | 2.526[0.646;9.876]    | 1.80E-01 | 1936 4 0                        | 516764 506 0                       | 0.00049 |
| COVID19 positive hospitalized vs COVID19 negative or unknown | C5      | M1          | <1% | 2.077[0.702;6.144]    | 1.90E-01 | 2081 4 0                        | 534324 640 1                       | 0.0006  |
| COVID19 positive hospitalized vs COVID19 negative or unknown | IFNL1   | M1          | <1% | 0.369[0.081;1.687]    | 2.00E-01 | 2085 0 0                        | 534607 357 1                       | 0.00033 |
| COVID19 positive hospitalized vs COVID19 negative or unknown | IL17RC  | M3          | <1% | 1.643[0.749;3.604]    | 2.20E-01 | 2080 5 0                        | 533824 1140 1                      | 0.00107 |
| COVID19 positive hospitalized vs COVID19 negative or unknown | VEGFA   | M3          | <1% | 0.558[0.219;1.418]    | 2.20E-01 | 2083 2 0                        | 533873 1091 1                      | 0.00102 |
| COVID19 positive hospitalized vs COVID19 negative or unknown | IL7R    | M1          | <1% | 1.668[0.692;4.019]    | 2.50E-01 | 2079 6 0                        | 533848 1117 0                      | 0.00105 |
| COVID19 positive hospitalized vs COVID19 negative or unknown | IL12B   | M3          | <1% | 2.200[0.438;11.048]   | 3.40E-01 | 2017 1 0                        | 526033 194 0                       | 0.00018 |
| COVID19 positive hospitalized vs COVID19 negative or unknown | IL23A   | M3          | <1% | 0.366[0.046;2.919]    | 3.40E-01 | 1938 0 0                        | 517449 282 1                       | 0.00027 |
| COVID19 positive hospitalized vs COVID19 negative or unknown | IL17RA  | M1          | <1% | 0.359[0.040;3.220]    | 3.60E-01 | 2020 0 0                        | 525537 228 0                       | 0.00022 |
| COVID19 positive hospitalized vs COVID19 negative or unknown | IFNLR1  | M3          | <1% | 0.366[0.040;3.321]    | 3.70E-01 | 1938 0 0                        | 517531 201 0                       | 0.00019 |
| COVID19 positive hospitalized vs COVID19 negative or unknown | IL1B    | M3          | <1% | 0.369[0.039;3.491]    | 3.80E-01 | 2005 0 0                        | 526208 262 0                       | 0.00025 |
| COVID19 positive hospitalized vs COVID19 negative or unknown | IFNL3   | M3          | <1% | 3.464[0.185;64.982]   | 4.10E-01 | 1939 1 0                        | 517141 129 0                       | 0.00013 |
| COVID19 positive hospitalized vs COVID19 negative or unknown | JAK1    | M1          | <1% | 1.942[0.398;9.474]    | 4.10E-01 | 1937 1 0                        | 517541 189 2                       | 0.00019 |
| COVID19 positive hospitalized vs COVID19 negative or unknown | JAK1    | M3          | <1% | 1.942[0.398;9.474]    | 4.10E-01 | 1937 1 0                        | 517541 189 2                       | 0.00019 |
| COVID19 positive hospitalized vs COVID19 negative or unknown | IFNLR1  | M1          | <1% | 0.365[0.030;4.527]    | 4.30E-01 | 1938 0 0                        | 517571 161 0                       | 0.00015 |
| COVID19 positive hospitalized vs COVID19 negative or unknown | IL1B    | M1          | <1% | 0.368[0.030;4.481]    | 4.30E-01 | 1873 0 0                        | 508320 212 0                       | 0.00021 |
| COVID19 positive hospitalized vs COVID19 negative or unknown | JAK2    | M1          | <1% | 0.366[0.029;4.555]    | 4.30E-01 | 1938 0 0                        | 517530 202 0                       | 0.00019 |
| COVID19 positive hospitalized vs COVID19 negative or unknown | IL23R   | M3          | <1% | 0.847[0.054;1.296]    | 4.40E-01 | 2067 18 0                       | 529085 586 119                     | 0.00551 |
| COVID19 positive hospitalized vs COVID19 negative or unknown | VEGFA   | M1          | <1% | 0.661[0.218;2.002]    | 4.60E-01 | 2083 2 0                        | 534217 747 1                       | 0.0007  |
| COVID19 positive hospitalized vs COVID19 negative or unknown | IL1R1   | M1          | <1% | 0.666[0.222;1.995]    | 4.70E-01 | 1936 2 0                        | 517281 444 7                       | 0.00044 |
| COVID19 positive hospitalized vs COVID19 negative or unknown | IL7R    | M3          | <1% | 1.269[0.666;2.419]    | 4.70E-01 | 2075 10 0                       | 532768 2197 0                      | 0.00205 |
| COVID19 positive hospitalized vs COVID19 negative or unknown | TMPRSS2 | M3          | <1% | 1.341[0.606;2.967]    | 4.70E-01 | 2077 8 0                        | 533498 1467 0                      | 0.00137 |
| COVID19 positive hospitalized vs COVID19 negative or unknown | IFNG    | M3          | <1% | 0.366[0.020;6.537]    | 4.90E-01 | 1873 0 0                        | 508402 130 0                       | 0.00013 |
| COVID19 positive hospitalized vs COVID19 negative or unknown | BTK     | M3          | <1% | 0.497[0.061;4.077]    | 5.10E-01 | 2020 0 0                        | 525622 114 29                      | 0.00016 |
| COVID19 positive hospitalized vs COVID19 negative or unknown | IL6     | M3          | <1% | 0.369[0.019;7.067]    | 5.10E-01 | 1953 0 0                        | 516905 122 0                       | 0.00012 |
| COVID19 positive hospitalized vs COVID19 negative or unknown | IL6R    | M1          | <1% | 0.377[0.020;7.210]    | 5.20E-01 | 1940 0 0                        | 517152 118 0                       | 0.00011 |
| COVID19 positive hospitalized vs COVID19 negative or unknown | IL12B   | M1          | <1% | 0.365[0.016;8.562]    | 5.30E-01 | 1873 0 0                        | 508442 90 0                        | 0.00009 |
| COVID19 positive hospitalized vs COVID19 negative or unknown | IL1R1   | M3          | <1% | 0.739[0.283;1.931]    | 5.40E-01 | 2082 3 0                        | 534274 684 7                       | 0.00065 |
| COVID19 positive hospitalized vs COVID19 negative or unknown | IL6     | M1          | <1% | 0.367[0.014;9.615]    | 5.50E-01 | 1873 0 0                        | 508423 109 0                       | 0.00011 |
| COVID19 positive hospitalized vs COVID19 negative or unknown | IFNGR1  | M3          | <1% | 0.651[0.149;2.841]    | 5.70E-01 | 2084 1 0                        | 534532 433 0                       | 0.0004  |
| COVID19 positive hospitalized vs COVID19 negative or unknown | IFNL2   | M3          | <1% | 1.481[0.380;5.766]    | 5.70E-01 | 2082 3 0                        | 534408 557 0                       | 0.00052 |
| COVID19 positive hospitalized vs COVID19 negative or unknown | IFNB1   | M3          | <1% | 0.828[0.423;1.623]    | 5.80E-01 | 2011 7 0                        | 524038 2186 3                      | 0.00208 |
| COVID19 positive hospitalized vs COVID19 negative or unknown | IFNG    | M1          | <1% | 0.364[0.011;12.464]   | 5.80E-01 | 1873 0 0                        | 508453 79 0                        | 0.00008 |
| COVID19 positive hospitalized vs COVID19 negative or unknown | JAK2    | M3          | <1% | 0.850[0.481;1.503]    | 5.80E-01 | 2075 10 0                       | 532245 2171 46                     | 0.00255 |
| COVID19 positive hospitalized vs COVID19 negative or unknown | IL4R    | M1          | <1% | 1.931[0.154;24.219]   | 6.10E-01 | 1937 1 0                        | 517553 179 0                       | 0.00017 |
| COVID19 positive hospitalized vs COVID19 negative or unknown | PDCD1   | M3          | <1% | 0.367[0.005;29.373]   | 6.50E-01 | 1873 0 0                        | 508473 59 0                        | 0.00006 |
| COVID19 positive hospitalized vs COVID19 negative or unknown | IL17A   | M1          | <1% | 0.364[0.004;35.613]   | 6.70E-01 | 1873 0 0                        | 508492 40 0                        | 0.00004 |
| COVID19 positive hospitalized vs COVID19 negative or unknown | IL23A   | M1          | <1% | 0.365[0.002;57.511]   | 7.00E-01 | 1873 0 0                        | 508494 38 0                        | 0.00004 |
| COVID19 positive hospitalized vs COVID19 negative or unknown | ACE2    | M1          | <1% | 0.392[0.002;61.868]   | 7.20E-01 | 1873 0 0                        | 508485 44 3                        | 0.00005 |
| COVID19 positive hospitalized vs COVID19 negative or unknown | IL1RAP  | M3          | <1% | 1.272[0.349;4.641]    | 7.20E-01 | 2083 2 0                        | 534386 579 0                       | 0.00054 |
| COVID19 positive hospitalized vs COVID19 negative or unknown | IL4R    | M3          | <1% | 1.534[0.147;16.057]   | 7.20E-01 | 2017 1 0                        | 526039 188 0                       | 0.00018 |
| COVID19 positive hospitalized vs COVID19 negative or unknown | PDCD1   | M1          | <1% | 0.367[0.002;83.673]   | 7.20E-01 | 1873 0 0                        | 508492 40 0                        | 0.00004 |
| COVID19 positive hospitalized vs COVID19 negative or unknown | CSF2    | M3          | <1% | 0.368[0.001;136.635]  | 7.40E-01 | 1873 0 0                        | 508491 41 0                        | 0.00004 |
| COVID19 positive hospitalized vs COVID19 negative or unknown | BTK     | M1          | <1% | 0.363[0.001;230.098]  | 7.60E-01 | 1873 0 0                        | 508505 27 0                        | 0.00003 |
| COVID19 positive hospitalized vs COVID19 negative or unknown | IFNGR1  | M1          | <1% | 0.807[0.145;4.481]    | 8.10E-01 | 2084 1 0                        | 534629 336 0                       | 0.00031 |

|                                                              |        |    |     |                       |          |           |                 |         |
|--------------------------------------------------------------|--------|----|-----|-----------------------|----------|-----------|-----------------|---------|
| COVID19 positive hospitalized vs COVID19 negative or unknown | ACE2   | M3 | <1% | 0.944[0.582;1.533]    | 8.20E-01 | 2079 2 4  | 532861 1626 478 | 0.00241 |
| COVID19 positive hospitalized vs COVID19 negative or unknown | CCR5   | M1 | <1% | 0.939[0.521;1.690]    | 8.30E-01 | 2077 8 0  | 532508 2453 4   | 0.0023  |
| COVID19 positive hospitalized vs COVID19 negative or unknown | CCR5   | M3 | <1% | 0.939[0.521;1.690]    | 8.30E-01 | 2077 8 0  | 532508 2453 4   | 0.0023  |
| COVID19 positive hospitalized vs COVID19 negative or unknown | IL1RAP | M1 | <1% | 1.281[0.142;11.540]   | 8.30E-01 | 1872 1 0  | 508333 199 0    | 0.0002  |
| COVID19 positive hospitalized vs COVID19 negative or unknown | CSF2   | M1 | <1% | 0.370[0.000;6631.170] | 8.40E-01 | 1873 0 0  | 508515 17 0     | 0.00002 |
| COVID19 positive hospitalized vs COVID19 negative or unknown | IL17RC | M1 | <1% | 1.113[0.317;3.899]    | 8.70E-01 | 2083 2 0  | 534378 587 0    | 0.00055 |
| COVID19 positive hospitalized vs COVID19 negative or unknown | IL17A  | M3 | <1% | 0.885[0.140;5.608]    | 9.00E-01 | 1872 1 0  | 508249 283 0    | 0.00028 |
| COVID19 positive hospitalized vs COVID19 negative or unknown | C5     | M3 | <1% | 0.984[0.670;1.445]    | 9.30E-01 | 2059 26 0 | 529016 5928 21  | 0.00558 |
| COVID19 positive hospitalized vs COVID19 negative or unknown | IL6R   | M3 | <1% | 1.089[0.143;8.291]    | 9.30E-01 | 2084 1 0  | 534746 219 0    | 0.0002  |
| COVID19 positive hospitalized vs COVID19 negative or unknown | IL17RA | M3 | <1% | 1.009[0.713;1.429]    | 9.60E-01 | 2052 33 0 | 527528 7417 20  | 0.00697 |
| COVID19 positive hospitalized vs COVID19 negative or unknown | IL33   | M3 | <1% | 0.988[0.649;1.505]    | 9.60E-01 | 2063 22 0 | 529239 5720 6   | 0.00536 |
| COVID19 positive hospitalized vs COVID19 negative or unknown | IFNB1  | M1 | <1% | 0.987[0.470;2.070]    | 9.70E-01 | 1946 7 0  | 515284 174 2    | 0.00169 |
| COVID19 positive hospitalized vs COVID19 negative or unknown | IL33   | M1 | <1% | 0.993[0.652;1.513]    | 9.70E-01 | 2063 22 0 | 529265 5694 6   | 0.00533 |
| COVID19 positive hospitalized vs COVID19 negative or unknown | IFNL2  | M1 | <1% | 0.992[0.240;4.100]    | 9.90E-01 | 2083 2 0  | 534469 496 0    | 0.00046 |

\* RR: individuals who have genotype Reference/Reference for all variants included in burden test. RA: individuals who have genotype Reference/Alternate for at least one variant. AA: individuals who have genotype Alternate/Alternate for at least one variant.
